# Supplementary material
Source: Frontiers journal article supplement (https://www.frontiersin.org/articles/176164)
Supplement: Table_1.XLSX [file Table_1.XLSX]

## Sheet: Table S1
Supplementary table 1. List of 6049 researchers that were invited by email to complete the online survey.
Italy	Spain	Germany	France	India	Greece	United Kingdom	Poland	China	Portugal	Netherlands	United states	Israel	Turkey	Belgium	Russia	Romania	Ireland	Austria	Hungary	Sweden	Bulgaria	Argentina	Croatia	Australia	Canada	Czech Republic	Serbia	Switzerland	Ukraine	Iran	Mexico	Colombia	Brazil	Denmark	Finland	Cyprus	Pakistan	Slovakia	Slovenia	Viet Nam	Japan	New Zealand	South Africa	Bangladesh	Estonia	South Korea	Cuba	Ethiopia	Lebanon
Assistant Prof Alessandro Sicora	Assistant Prof Alejandro Bellogin	Assistant Prof Béatrice Hendrich	Assistant Prof Bruno El-Bennich	Assistant Prof Deepak Kumaran Nair	Assistant Prof AIKATERINI THEODORIDOU	Assistant Prof David Russell	Assistant Prof Bozena Mierzejewska	Assistant Prof Enming Zhang	Assistant Prof Ana Teixeira	Assistant Prof Dirk-Jan Scheffers	Assistant Prof Kristina Richardson	Assistant Prof Ami Citri	Assistant Prof BERNA OZBEK	Assistant Prof Jo Seldeslachts	Associate Prof Julia Lajus	Assistant Prof Claudiu Cristian Botar	Assistant Prof Shane Donal Bergin	Associate Prof Enikoe Kallay	Associate Prof Arpad Dobolyi	Assistant Prof Devrim Goktepe-Hulten	Assistant Prof Svetoslav Ivanov	Dr Carlos Javier Cowan Ros	Assistant Prof Damir Kovacic	Associate Prof Clayton Adam	Assistant Prof Leigh Anne Swayne	Assistant Prof Alexandr Jonas	Assistant Prof Milan Mirkovic	Assistant Prof Sandra Hofmann	Associate Prof Vyacheslav Burlayenko	Dr Arash Maskooki	Assistant Prof Elizabeth Villa	Dr Andres Alberto Aristizabal Pinzon	Assistant Prof Gustavo Brand	Assistant Prof Susan Holdt	Assistant Prof Masoud Daneshtalab	Assistant Prof Loucas Louca	Assistant Prof Muhammad Khurram Bhatti	Assistant Prof Adriana Hanulikova	Assistant Prof Franc Požgan	Assistant Prof Quoc Chi Nguyen	Associate Prof Norichika Kanie	Dr Calvin Young	Associate Prof Arshnee Moodley	Dr Mohammad Amir Hossain	Dr Indrek Ibrus	Assistant Prof Ick-Jae Yoon	Dr Alejandro Cabezas-Cruz	Dr Addis Mekonnen Adamu	Dr Elie Kawerk
Assistant Prof Andrea Bassi	Assistant Prof Alexandre Graell i Amat	Assistant Prof Elizabeth Schmidt	Assistant Prof Christophe Eloy	Assistant Prof Dipankar Chakrabarti	Assistant Prof Andreas Tsakalof	Assistant Prof Jonathan Pritchard	Assistant Prof Jakub Gismatullin	Assistant Prof Jinting Wu	Assistant Prof Ana-Teresa Maia	Assistant Prof Femke Lamers	Assistant Prof Matthew Blaschko	Assistant Prof Amir Rozental (Rosenthal)	Assistant Prof Cengiz Acarturk	Assistant Prof Johan Ceusters	Dr Alexander Chamorovskiy	Assistant Prof Dinita Alin	Associate Prof David Wood	Associate Prof Gernot Plank	Associate Prof Márton Szentpéteri	Assistant Prof Jens Hjerling-Leffler	Associate Prof Anife Ahmedova	Dr Cristina Hoppe	Assistant Prof Igor Jurak	Dr Adam Culvenor	Associate Prof Rilla Khaled	Dr Iva Fukova	Dr Bojana Visic	Assistant Prof Terrapon Vincent E.	Dr Aleksandr Tolstov	Dr mahdi shirazi	Assistant Prof Julio T. Barreiro	Mr Camilo Lozano	Assistant Prof Gustavo Carneiro	Assistant Prof Ulrik Beierholm	Dr Harri Kiiskinen	Dr Andreas Panayides	Associate Prof Ishtiaq Ali	Assistant Prof Milan Balaz	Assistant Prof Miha Ravnik	Dr Anh Hung Duong	Dr Akimitsu Narita	Dr Emma Louise Scotter	Associate Prof Craig West	Dr Mufti Mahmud	Dr Lauri Peil	Dr Chang-Seong Moon	Dr Elder Pupo Escalona	Dr Dargie Hailu Deribew	Dr Mesrob Ichkhan Ohannessian
Assistant Prof Barbara Cavalazzi	Assistant Prof David Basanta Gutierrez	Assistant Prof Frauke Zeller	Assistant Prof Dominique Helmlinger	Assistant Prof Gaurav Batra	Assistant Prof Antonios Stamatogiannakis	Assistant Prof Paul Stephenson	Associate Prof Elzbieta Kolaczkowska	Assistant Prof Ning Yan	Assistant Prof Carlos Serrão	Assistant Prof Harry van Leeuwen	Assistant Prof Scott Shaw	Assistant Prof Arnon Hershkovitz	Assistant Prof Fisun Hamaratoglu	Assistant Prof Joris Paul Wim Verbiest	Dr Alexander Dementjev	Assistant Prof Petre Dorel Teodosescu	Associate Prof Iseult Lynch	Dr Aaron Alt	Associate Prof Mate Erdelyi	Assistant Prof Malin Bjornsdotter	Associate Prof Atanas Kostadinov	Dr Cristina Marino-Buslje	Assistant Prof Ivana Zagorac	Dr Andrew Gargett	Dr Alyssa Joyce	Dr Jaroslav Malina	Dr Dejan Dodig	Dr Alexandra Trachsel	Dr Alexandra Antoniouk	Dr Mahsa Seyyedian Choobi	BSc Andrea Flores Ibarra	Mr Pedro Patio Garcia	Associate Prof Paula Coelho	Associate Prof Anders Schomacker	Dr Jatta Huotari	Dr Charalambos Antoniades	Dr aurangzaib khawaja	Associate Prof Lubica Lacinova	Dr Ales Holobar	Dr Nga Pham	Dr Hiroatsu Sato	Dr Nancy November	Associate Prof Lambert Engelbrecht	Dr Uttam Paul	Dr Leopold Parts	Dr Dong-hyuk Shin	Dr Maria Beatriz Herrera-Sanchez	Dr Natnael Hamda	Dr Patrick BARHOUM
Assistant Prof Claudio Persello	Assistant Prof Fidel Costa	Assistant Prof Jörg Trojan	Assistant Prof Ines Di Loreto	Assistant Prof Ramchandra Narhe	Assistant Prof Aristeidis Parmakelis	Assistant Prof Paula Longhi	Associate Prof Irena Iskra-Golec	Associate Prof Chaozhong Wu	Assistant Prof Fernando José da Silva Velez	Assistant Prof Ilja Voets	Associate Prof Alex Volinsky	Assistant Prof Boaz Ben-David	Assistant Prof Gönenç Yücel	Assistant Prof Peter Claeys	Dr Alexander Kalsin	Associate Prof Adrian Plesca	Associate Prof Jennifer McElwain	Dr Andrea Hess	Associate Prof Tamás Visi	Assistant Prof Martin Fredriksson	Associate Prof Lidia Galabova	Dr David Galvan	Assistant Prof Neven Barišić	Dr Andrew McCulloch	Dr Ami Patel	Dr Jitka Soukupova	Dr Dragoljub Gajic	Dr Daniel Praeg	Dr Alla Artemenko	Dr Mazdak Ghajari	Dr Angelica Cuapio Gomez	Ms Carolina Garcia	Dr Antonio Meireles-Filho	Associate Prof Thomas Ryttov	Dr Jessica Stapley	Dr Charalambos Poullis	Dr Maaheen Ahmed	Dr Ivan Cimrak	Dr Jernej Iskra	Dr Phuc-Khanh Nguyen	Dr Katsumasa Tanaka	Dr Sarina Iwabuchi	Dr Bridgette CONNELL	Mr Kabir Ahsanul	MSc Pille Strauss-Raats	Dr Heejae Kim	Dr Maykel Leonardo González-Martínez	Mr Ermias Walelgne	Mr jad sassine
Assistant Prof Elena D'Onghia	Assistant Prof Ines Pineda-Torra	Assistant Prof Nadja Milewski	Assistant Prof Johan Richard	Assistant Prof Shankaranarayanan Subramaniam	Assistant Prof Charalampos Spilianakis	Associate Prof Cyrill Bussy	Associate Prof Maciej Mitrega	Associate Prof Yongxing Shen	Assistant Prof Gonçalo Castelo-Branco	Assistant Prof Marieke van Vugt	Associate Prof Emily Cross	Assistant Prof Eilon Sherman	Assistant Prof GUNEY YAPICI	Assistant Prof Tom Francart	Dr Alexander Shapiro	Associate Prof Elena Simona Lohan	Dr Andrias O'Reilly	Dr Angelika Riemer	Dr Andras Tartally	Assistant Prof Per Jesper Sjöström	Associate Prof Milen I. Georgiev	Dr Eduardo Nicolas Schulz	Assistant Prof Tonko Garma	Dr Anthony Morley	Dr Bissan Ghaddar	Dr Kvido Strisovsky	Dr Drasko Draskovic	Dr Flurin Vils	Dr Anton Klymovskiy	Dr Naseh Hosseini	Dr Carlos Alberto Chavez Barajas	Ms Sara Jane Gonzalez Caicedo	Dr Cintia Salomao Pinto Zarth	Dr Emil Thybring	Dr Kristiina Hilden	Dr Constantinos Lazarou	Dr Majid Butt	Dr jano klimas	Dr Maja Veselic	Dr Van-Son Dang	Dr Shuhei Nakamura	Dr Sean Richard Anthony Devenish	Dr Claudiu Cristian Remsing	Mr Md Ehsanul Alam	PhD Aleksander Valjamae	Dr Hoon Ko	Dr Reynier Suardíaz	Mr Henok Asmelash	Ms Nadine Zeeni
Assistant Prof eva del soldato	Assistant Prof Jose M. Eirin-Lopez	Assistant Prof Simon Kuhn	Assistant Prof Josue Sznitman	Assistant Prof Sujin Bemplasseri Babu	Assistant Prof Demosthenes Fokas	Associate Prof Yafei Wang	Associate Prof Marcin Paprzycki	Dr Bo Li	Assistant Prof Jorge Ruas	Assistant Prof Martin Witte	Associate Prof Matt Tagger	Assistant Prof Golan Bel	Assistant Prof Mehmet Ismet Can Dede	Assistant Prof Veronique Van Elewyck	Dr Anastasia Bochenkova	Associate Prof Florin Isaila	Dr Angela Byrne	Dr Anne-Marie Krachler	Dr Anett Kiss	Assistant Prof Petronella Kettunen	Associate Prof Stefka Fidanova	Dr Federico Davila	Associate Prof Rajka M. Liscic	Dr Ashkbiz Danehkar	Dr Christopher Smeenk	Dr Manuel Acosta	Dr Ivan Rajkovic	Dr Frederic Alain Sinniger	Dr Denys Naumenko	Dr Vahideh Habibpour	Dr Cristina CASTELLANO	MSc Carlos Alberto Fajardo	Dr Cristina Banks-Leite	Dr Jan Tønnesen	Dr Marko Tapani Pesu	Dr Eleni Heracleous	Dr Muhammad Ateeq	Dr Jozef Hritz	Dr Miha Milek	Mr Duc Dinh	Dr Taichiro Iki	Mr Andrew Christopher James Wade	Dr Colleen Seymour	Mr Md Forhad Rabbi	PhD Andres Braunbrück	Dr Jin Young Park	PhD Alain Delgado Gran	Mr Heruy Mengistu	MSc Bechara Georges Mfarrej
Assistant Prof Francesca Spagnoli	Assistant Prof Lourdes Gude-Rodriguez	Assistant Prof Stephan E. Wolf	Assistant Prof Pierre Jehel	Assistant Prof Sunil Nair	Assistant Prof ELENI PAVLOPOULOU	Dr Adam Hill	Associate Prof Ryszard Stocki	Dr Changhong Zhan	Assistant Prof José Alberto Sardinha	Assistant Prof Mettine Bos	Associate Prof Reza Rejaie	Assistant Prof izhak kehat	Assistant Prof SEDA KIZILEL	Associate Prof Bert Willems	Dr Andrey Anikeev	Associate Prof Nicolae Leopold	Dr Barry Hayes	Dr Anton Tamtögl	Dr Attila Maroti	Assistant Prof Robert Ekblom	Associate Prof Velislava Terzieva	Dr Federico Pelisch	Associate Prof Snezana Miljanic	Dr Belinda Jane Westman	Dr Colin McNally	Dr Martin Anger	Dr Marko Spasenovic	Dr Frédéric Lador	Dr Ganna Nechyporenko	Mr Marjan Samiepour	Dr Diana Davila	MSc Ivan Dario Caicedo Sierra	Dr Gislene Pereira	Dr Jesper Levinsen	Dr Riitta Nissinen	Dr Emine Cagin Bertsch	Dr Salman Aziz Mian	Dr Lubor Frastia	Dr Nejc Hodnik	Mr Phuong Ho Ngoc	Dr Tatsuya Kaminishi	Mr Anthony Riseley	Dr Ilne Grobler	Mr Md Nazmul Azim Beg	PhD Anneli Kährik	Mr Junghan Kim	PhD Lázaro René Izquierdo Fábregas	Ms Mahlet anche	PhD Chrystelle Salameh
Assistant Prof Francesco Brardinoni	Assistant Prof Luis Guillermo Villanueva	Associate Prof Albert Schliesser	Assistant Prof Pierre-Yves Lozach	Associate Prof Ashok Patel	Assistant Prof Georgia Gregoriou	Dr Adam Toon	BSc Magdalena Kasendra	Dr Chen Chen	Assistant Prof Jose Aleixo	Assistant Prof Peter Dijkstra	Associate Prof Rodrigo Almeida	Assistant Prof Liat Raz-Yurovich	Assistant Prof Selcuk Baktir	Associate Prof Gerlinde De Deyn	Dr Andrey Fedorenko	Associate Prof Simona Pinzaru	Dr Beatrice Smyth	Dr Armin Wasicek	Dr Balazs Hangya	Associate Prof Åsa Winther	Dr Boris Grozdanoff	Dr Felix Palumbo	Dr Biljana Zafirova	Dr Cameron Smith	Dr Dawn Keim	Dr Michael Volny	Dr Srdjan Vesic	Dr Gilles Buchs	Dr Irina Belskaya	Mr Mohammad Azizian	Dr Elena Garcia-Cano	MSc Ivan Dario Paez Anaya	Dr Guilherme Bontorin	Dr Lars Rishoj	Dr Sami Paavilainen	Dr Giorgos Papantoniou	Dr shumaila karamat	Dr Lubos Cipak	Dr Peter Krajnik	Ms Loan Thi To Vo	PhD Eri Sakata	Ms Ming Tsuey Chew	Dr Raelize Du Plooy	Mr Mohammad Nasim	PhD Elin Org	Ms Sung Won Kim	PhD Miriam Ojeda Ojeda	MSc Chala Tesgera	PhD Elias Bechara
Assistant Prof Gian Paolo Cimellaro	Assistant Prof Manuel Gonzalez Guerrero	Associate Prof Immo Prinz	Assistant Prof Romain Malejacq	Associate Prof Govind Krishnaswami	Assistant Prof Georgios Papagianankis	Dr Ajibola Omokanye	Dr Agnieszka Franczak	Dr Chengfang Pang	Assistant Prof Marco Vasconcelos	Assistant Prof Sita Vermeulen	Dr Aaron Rosengren	Assistant Prof Liran Carmel	Assistant Prof Serdar Goktepe	Associate Prof Guy-Bart Stan	Dr Andrey Frolov	Dr Alina Mariana Balu	Dr Borbala Farago	Dr Christian Möstl	Dr Balázs Székely	Associate Prof Cecilia Persson	Dr Dan Hossamov Georgess	Dr Gonzalo Agustin Alvarez	Dr Dalibor Milic	Dr Dane Austin	Dr Ekaterina Yahyaoui Krivenko	Dr Michal Skruzny	Dr Tatjana Kosanovic	Dr Guy Giuffredi	Dr Kseniia Katok	Mr Mohammad Izadi Najafabadi	Dr Francisco Federico Nunez de Caceres Gonzalez	MSc Johana Grajales	Dr Leonardo Contreira Pereira	Dr Peter Browne R繪nne	Dr Susanna Repo	Dr Heraklidia Ioannidou	Dr SONIA ZULFIQAR	Dr Lucia Hosekova	Dr Tanja Kocjancic Antolik	Ms MY LINH Suzanne TRAN VAN THI	PhD Keisuke Hatada	PhD Damian Moran	Mr Anthonie Kunneke	Mr Mohammad Tarequzzaman	PhD Inga Zaitseva-Pärnaste	PhD Joonwoo Bae	PhD Sandro Vega Pons	PhD Student Alemnew Sheferaw Asrese	PhD Student Carmen Sadaka
Assistant Prof Giuseppe Orlando	Assistant Prof Mónica Fernández-Monreal	Associate Prof Inga Hege	Assistant Prof Thomas MICHEL	Associate Prof Prakash Vincent	Assistant Prof Ioannis Dimitriou	Dr Alan Ross	Dr Aleksandra Baron-Wiechec	Dr Chun Liu	Assistant Prof Paula Campos	Assistant Prof Vincent van Hinsberg	Dr Aaron Schurger	Assistant Prof Maytal Caspary Toroker	Assistant Prof Serhat Erkucuk	Associate Prof Matthieu Verstraete	Dr Andrey Pichugin	Dr Anca Dumitru	Dr Brian Cahill	Dr Christopher Burghuber	Dr Balazs Szent-Ivanyi	Associate Prof Gustaf Hugelius	Dr Desislava Todorova	Dr Juan Facundo Albacete Colombo	Dr Ivica Cvrtila	Dr David Croucher	Dr George Bruseker	Dr Patricie Mertova	Mr Aleksandar Pajkanovic	Dr Jakob Leimgruber	Dr Maksym Seredyuk	Mr Navid Valizadeh	Dr Gabriela Toledo-Ortiz	MSc Laura Bohorquez	Dr Leonardo Jose Mataruna dos Santos	Dr Stinus Lindgreen	Dr Timo Tuuri	Dr Kostas Fanti	Dr Zahid Riaz	Dr Ludovit Paulis	Dr Vasko Jovanovski	MSc Vu Phuong Thuy	PhD Student Hitoshi SHIOTA	PhD Hayden Cawte	Mr Naadirah Grimsel	Mr Pratanu Roy	PhD Maksim Antonov	PhD PIL HO KIM	PhD Student Diana Gisell Figueroa del Valle	PhD Student Girum Ayalneh Tiruye	PhD Student Fadi HAJJ
Assistant Prof Giuseppina Caretti	Assistant Prof Santiago Fernandez Gonzalez	Associate Prof Maren Wellenreuther	Associate Prof Bruno DE CARA	Associate Prof Sekar Raju	Assistant Prof Konstantinos Makris	Dr Alastair Sutherland	Dr Andrzej Pacak	Dr Chunglee Kim	Assistant Prof SARA MAGALHAES	Associate Prof Frank Dekker	Dr Alexander Robinson	Assistant Prof Sharon Ruthstein	Associate Prof Ali Cafer Gürbüz	Associate Prof Thomas Hamelryck	Dr Anna Chirkova	Dr Anca Gheaus	Dr Bridget Kane	Dr Clemens Decristoforo	Dr Balazs Veres	Associate Prof Jens Edlund	Dr Eugenia Markova	Dr Juan José Bonfiglio	Dr Ljiljana Fruk	Dr Firas Awaja	Dr Heidi Carmen Howard	Dr Pavel Izk	Ms Jovana Milenkovic	Dr Jane Wilhelm	Dr Oksana Shramkova	Mr Pouya Ahmadian	Dr Gustavo Adolfo Zelada Guillen	MSc Miguel Angel Cabrera Cabrera	Dr Mauricio Manfrini	Dr Thomas Hesselberg	Dr Veli-Pekka Jaakola	Dr Maria Dikomitou-Eliadou	Dr Zahid Usman	Dr Michal Juricek	Mr Matevz Domajnko	PhD Student Hong Duong	PhD Student Rurika Oka	PhD Student Richard Bade	Mr Rory Biggs	Ms Momena Khatun	PhD Student Nele Aas	PhD Student SUJIN HONG	PhD Student Robert Carcasses Quevedo	PhD Student Sisay Adugna Chala	PhD Student Mayyasa Rammah
Assistant Prof Ivano Benedetti	Assistant Prof Sergi Bermúdez i Badia	Associate Prof Mark Manger	Associate Prof Céline Marban	Dr Abdul Sheik	Assistant Prof Leonidas Alexopoulos	Dr Alexander Barrow	Dr Anetta Kopecka	Dr Chunning Ji	Assistant Prof Susana Andrade	Associate Prof Huub Maas	Dr Alexandria Anderson	Assistant Prof Udi Sommer	Associate Prof Alptekin Temizel	Dr Alex Borgoo	Dr ARKADIY SOLOVYEV	Dr Andrada LAZEA-STOYANOVA	Dr Carrie Griffin	Dr Clemens Grabher	Dr Csilla Hudek	Associate Prof Johannes Hanson	Dr Evelina Pavlova Slavcheva	Dr Juan Pablo Busalmen	Dr Matija Harcet	Dr Gavin Kane	Dr Jacky Chow	Dr Petr Kocalka	MSc Aleksandar Mojsic	Dr Juliane Sauer	Dr Oleksandra Kukharenko	Mr Shervin Khakpour	Dr Juan Pablo Esquivel Bojorquez	MSc Paola Andrea Forero Cortes	Dr Rogério Salloum	Mr Jim Rasmussen	Mr Antti Hassinen	Dr Marinos IOANNIDES	Mr Ahmad Choudhary	Dr Milan Remis	Ms Janja Komljenovic	PhD Student Huong May Truong	PhD Takuma Suda	PhD Wing-Yee Lo	Ms Brigite Brandao	PhD QUAZI TANMINUL HAQUE SHUBHRA	PhD Toomas Lott	PhD Wookjin Lee	PhD Student Rosana Martinez Turtos	PhD Student Tewodros Kebede	PhD Student Mazen Harb
Assistant Prof Luca Pilia	Assistant Prof Susanna Lopez-Legentil	Associate Prof Markus Hennrich	Associate Prof Eric van Hullebusch	Dr Abhroop Garg	Assistant Prof Nikolas Fokialakis	Dr Alfred James Moore	Dr Anna Bartosik	Dr Dong Xu	Associate Prof Paulo Garcia	BSc Henk ten Pierick	Dr Alice Ohlson	Associate Prof Alejandro Sosnik	Associate Prof Baris Coskunuzer	Dr Anne Mouchet	Dr Denis Derkach	Dr Andreea Calin	Dr Christopher Jepsen	Dr Franz Herzog	Dr Daniel Torocsik	Associate Prof Leonard Sandin	Dr Gergana Noutcheva	Dr Julieta Sztarker	Dr Petar Mimica	Dr Gemma Richards	Dr Lisa-Christine Girard	Dr Petr Lichtneger	MSc Gvozden Neskovic	Dr Kenneth John Gunter	Dr Olga Shekhovtsova	MSc Alireza Nateghi	Dr Maria Fernanda Jimenez Solomon	MSc Victor Jaramillo	Mr Arthur Taylor	Mr Jost-Henrik Morgenstern	MSc Ella Nukarinen	Dr PAVLOS STEPHANOU	Mr HABIB JAN	Dr Roman Derco	MSc Luka Šafarič	PhD Student PHAN Quang Tien	PhD Yasuhiko Irie	Prof Christopher O. Miles	Ms Nodumo Zulu	PhD Student G M Atiqur Rahaman	Prof Irene Kull	PhD Yoojin Oh	PhD Yeny Martínez de la Torre	PhD Yonatan Afework Tesfahunegn	PhD Student Sara Faraj
Assistant Prof Luca Pozzoli	Assistant Prof Victor Torres Company	Associate Prof Matthias Kling	Associate Prof Jean-Charles Augereau	Dr Amit Chattopadhyay	Assistant Prof Sotirios Tsaftaris	Dr Alice Bowen	Dr Anna Nagy-Staron	Dr Dongfeng Gu	Dr Agostinho Rocha	Dr Anna Wesselink	Dr Allison Stagg	Associate Prof Cheryl Zlotnick	Associate Prof Cagdas Son	Dr Axelle Vire	Dr Dmitry Dirin	Dr Andreea Tutulan-Cunita	Dr Ciaran Murphy Royal	Dr Georg Goliasch	Dr Daniel Ungar	Associate Prof Vania Ceccato	Dr Guergana Guerova	Dr Luis Palazzesi	Dr Robert Lovrincic	Dr Hannah Keage	Dr Maanasa Raghavan	Dr Richard Wünsch	MSc Nenad Zoric	Dr Luc Henry	Dr Rayisa Moiseyenko	MSc Mahdie Karbasi	Dr Mariana Cano Diaz	MSc Viviana Dionicio	MSc Mary Ann Xavier	Mr Mizio Andersen	MSc Kimmo Lähteenkorva	Mr Andreas Pospori	Mr Iqbal Hussain	Dr Stanislav Gunár	PhD Dolores Kukanja	PhD Student Que Anh DANG	PhD Yusuke AZUMA	Prof Geoff Chase	Ms Yolanda Mthembu	PhD Student Imad Faruque	Prof Mart Min	Prof Kang-Hun Ahn
Assistant Prof manuela caiani	Associate Prof Alicia Sintes Olives	Associate Prof Robert Nickel	Associate Prof Julien Toulouse	Dr Amit Deshpande	Assistant Prof Theodoros Zachariadis	Dr Andrew Foote	Dr Bartosz Tylkowski	Dr Feng Gao	Dr Alfredo Pereira	Dr Annemarie Boleij	Dr Angela Kim Harkins	Associate Prof Dan Peer	Associate Prof Gozde Unal	Dr Barbara van Doosselaere	Dr Ekaterina Obraztsova	Dr Constantin Parvulescu	Dr Cindy Smith	Dr Heike M. A. Ehmann	Dr Ellak Somfai	Dr Adam Jerzy Maria Kirrander	Dr Hristo Koshutanski	Dr Mariano Galvagno	Dr Robert Vianello	Dr Ian Simpson	Dr Matthew Bamsey	Dr Roman Gröger	MSc Nikola Markovic	Dr Michele Christine Erat	Dr Roman Taranets	MSc Majid Farzin	Dr Martha Luevano Salinas	PhD Fabio Andrade Rengifo	PhD Adriano Fabro	Mr Peter Karlsen	MSc Noora Ottman	Mr Christodoulos Efstathiades	Mr MUHAMMAD AJMAL KHAN	Dr Zuzana Fekiacova	PhD Gregor Pipan	PhD Student Thi My Hoa Vo	Prof Hajime Ishihara	Prof June Verner	MSc Elnari Potgieter	PhD Student Mostafa Moonir Shawrav
Assistant Prof Marco Benini	Associate Prof Ana Pérez-del-Olmo	Associate Prof Susanne Wurst	Associate Prof Karima Chergui	Dr Amit Jabgunde	Assistant Prof Yannis Velegrakis	Dr Andrew Phillips	Dr Beata Guzow-Krzemińska	Dr Feng Yin	Dr Ana Claudia Machado Rebelo Marques	Dr Annemarie Koster	Dr Anna Nesterova	Associate Prof Eytan Katzav	Associate Prof Özgür Orhangazi	Dr Barbara Vanhoecke	Dr Ekaterina Shorohova	Dr Cosmin Ioan Suciu	Dr Claire Heaney	Dr Jörg Tomaschek	Dr Gergo Orban	Dr Alexander Ivanov	Dr Ina Dimitrina Merdjanova	Dr Mariela Sandra Juana Chertoff	Dr Vernesa Smolcic	Dr James Lennox	Dr Nancy Salmon	Dr Tomas Moravec	MSc Pavle Mijovic	Dr Roland Erne	Dr Valentyna Romanova	MSc Narges Javaheri	Dr Martha Verónica Escárcega Bobadilla	PhD Frank Arroyave	PhD Alisson Gontijo	MSc Ida Smith	MSc Petri Tani	Mr Neo Kaplanis	Mr Muhammad Boota	Mr Boris Tomasik	PhD Marija Drenkovska	PhD Student Thi Thu Le	Prof Ichiro Minami	Prof Nikola Kasabov	PhD Student Jacki Gilmore
Assistant Prof Marco Masia	Associate Prof Carlos Untiedt	Dr Ales Obrdlik	Associate Prof Katia Jaffres-Runser	Dr Amol Hukkerikar	Associate Prof Apostolos Lampropoulos	Dr Andrew Strudwick	Dr Daniel Gromadzki	Dr GUANGFENG ZHANG	Dr Ana Margarida Coelho dos Santos	Dr Annemieke van der Goot	Dr Anna Vagstad	Associate Prof haim permuter	Associate Prof ÖZLEM ARZU AZER	Dr Bart Adriaenssens	Dr Elena Chernetsova	Dr Cristian Peptu	Dr Conor O'Carroll	Dr Julia Petschnigg	Dr Gyorgy Szekely	Dr Anders Södergren	Dr Irina Stoyanova	Dr Natalia Gavazzo	Mr Ante Jukić	Dr John Greenwood	Dr Talia Isaacs	Dr Tomas Svaton	MSc Zarko Milojevic	Dr Samuel Monnier	Dr Vladyslav Vyazovskiy	MSc Sonia Gholami	Dr Paul Olalde Velasco	PhD Heidi Ruiz	PhD Cassia Valentini Botinhao	MSc Marie Mardal	PhD Annika Hamalainen	Mr Stephanos Ioannou	Mr Syed Awais Rouf	Mr Brian Fabo	PhD Marko Virsek	PhD Student Tran Trung Luu
Assistant Prof Michele Amato	Associate Prof David Sanchez	Dr Alexander Kappes	Associate Prof Marielle Debos	Dr Anand Dokania	Associate Prof Dionysios Papachristou	Dr Andrew Wells	Dr Dariusz Buraczewski	Dr Guofang Xu	Dr Ana Rosa Aires Neto Da Silva	Dr Annemieke Verboon	Dr Araceli Valle	Associate Prof Koby Crammer	Associate Prof Petek Ballar	Dr Charlotte Steenbrugge	Dr Elena Gogvadze	Dr Dumitru Trucu	Dr Daniel Roche	Dr Julia Wilflingseder	Dr Ildiko Nagy	Dr Andreas Almqvist	Dr Ivailo Atanasov	Dr Pablo Emiliano Tomatis	Mr Fran Supek	Dr Karlie McDonald	Dr Trushar Patel	Mr David Kosar	PhD Aleksandar Jevtic	Dr Tobias Koch	Dr Volodymyr Turchenko	PhD Benjamin Fonooni	Dr Pavel Ernesto Rueda Orozco	PhD Marcia Ivonne Peña Paz	PhD Luciano Pighinelli	MSc Morten Korslund	PhD Janne Pakarinen	Ms Christina Psaroudaki	Mr Umar Saeed	Mr Peter Kopk	PhD Miha Homar	PhD Trung Cao
Assistant Prof Nadia Ansini	Associate Prof ENRIQUE PREFASI	Dr Alexander Merle	Associate Prof Olivier Bareille	Dr Aneesh Vijayan	Associate Prof Ioannis Platis	Dr Angela Feechan	Dr Dariusz Krol	Dr Hai Lin	Dr Celso Almeida	Dr Arend Schwab	Dr Arbel Tadmor	Associate Prof Maria Chait	Associate Prof Ufuk HANCILAR	Dr Dorien Herremans	Dr Evgeniy Redekop	Dr Elena Cristina Corbos	Dr Danielle Petherbridge	Dr Karin Anna Hummel	Dr Imre Miklos Szilagyi	Dr Berit Åström	Dr Ivaylo Ivanov	Dr Rodrigo Silveira	Mr Vladimir Pejakovic	Dr Kevin Mcdonald	Dr Youssef Belmabkhout	Mr David Svec	PhD Boris Jovanovic	Dr Yolanda Schaerli	Dr Yegor Domanov	PhD Hamed Bostan	Mr Alma J. Mendoza Lugo	PhD Mauricio Soto Alvarez	PhD Student Camila Garcia	MSc Nikolaj Nielsen	PhD Kimmo Rantalainen	Ms Margarita Papaefthymiou	Mr Usman Rehman	MSc Jan Simunek	PhD Student Aleksandra Pekosak	Research Assistant Tong Duy Son
Assistant Prof Nerina Gnesutta	Associate Prof Eva Miranda	Dr Alexander Rohe	Associate Prof PHILIPPE MOREAU	Dr Aniruddha Chandra	Associate Prof Kiki Theodorou	Dr Anna Holder	Dr Dawid Pinkowicz	Dr Honghan Wu	Dr David Aragao	Dr Arie van Steensel	Dr Ben Poulter	Associate Prof Oded Hod	Dr Ali Emre Pusane	Dr Dries Huygens	Dr Evgeny Zhuravlev	Dr Elena Magdalena Craciun	Dr David Newport	Dr Katja Wassmann	Dr Janos Kriston-Vizi	Dr Clinton Ramstadius	Dr Konstantin Golemanov	Dr Victoria Flexer	Ms Ani Gerbin	Dr Lisa Smith	Mr Creighton Connolly	Mr Jan Berka	PhD Ivan Korolija	Mr Jerome Caffaro	Dr Yevgeniy Ivanisenko	PhD Student Arash Asadi	Mr Raúl Antonio Ortiz Merino	PhD Monica Sierra	PhD Student Clara Gomes	PhD Lise Gjedssø Bertelsen	PhD Kristiina Iljin	Ms Marlen Parari	MSc Kamran Ali Syed	PhD Kamila Borsekova	PhD Student Marina Polak
Assistant Prof Paolo Porchia	Associate Prof FRANCISCO FLOREZ-REVUELTA	Dr Andre Janssen	Associate Prof Ramia Mazé	Dr Aniruddha Mitra	Associate Prof Konstantinos Kalogeropoulos	Dr Calum MacKichan	Dr Elzbieta Gumienna-Kontecka	Dr Hui Wang	Dr David Pina	Dr Brenda Westerhuis	Dr Brendan Orner	Associate Prof Ron Lavi	Dr Arzu Colak	Dr Ellen Dirkx	Dr Evgueni Goudzovski	Dr Elena Roxana Margine	Dr David O'Shaughnessy	Dr Lioba Lobmayr	Dr Julianna Olah	Dr Gisela Priebe	Dr Kristina Bliznakova	Mr Daniel Casagrande	Ms Renata Dombrovski	Dr Maja Mikula	Mr Dimitrios Molos	Mr Jan Skocek	PhD Ivana Matic	Ms Mariana Blagojevic	Mr Dmytro Dziuma	PhD Student Ataollah Mokhberdoran	MSc Bernardo Chavez Rivas	PhD Student Adriana Y M Cruz	PhD Student Daniel Ricardo dos Santos	PhD Martin Nielsen	PhD Laura Salonen	PhD Lefki Kourea	PhD Student Mehmood Ahmad	PhD Martina Sladkova	PhD Student Matevz Cerv
Assistant Prof Pasquale Cavaliere	Associate Prof Gabriela Guillena Townley	Dr Andrea Lubbe	Associate Prof Roman Teisserenc	Dr Anita Sarkar	Associate Prof Stelios Bekiros	Dr Caroline Witton Warner	Dr Elzbieta Korolczuk	Dr Hui Zhang	Dr Duarte Barral	Dr Corette Wierenga	Dr Brian Nail	Associate Prof Tomer Toledo	Dr Ayse Kayitmazer	Dr Emmanuel Vander Poorten	Dr Igor Samsonov	Dr ELENA STOICA	Dr Declan Carolan	Dr Lorenz Johann Maria Von Smekal	Dr Karoly Takacs	Dr Hedvig Landenius Enegren	Dr Marina Dobreva	Mr Gustavo Damián Gil Gargolani	MSc Bozo Zonja	Dr Matt Hayward	Mr Erik Ziegler	Mr Martin Slovak	PhD Jelena Nedjic	Ms Nurit Melanie Ezra	Mr Pavlo Bazilinskyy	PhD Student Azadeh Attari	MSc Carlos Humberto Ortiz Ramírez	PhD Student alexander cardenas	PhD Student Denise Salmon	PhD Michael Kirkedal Thomsen	PhD Leena Viiri	PhD Student Andreas Patsalos	PhD Student Mohammad Hassan Khalid	PhD Miroslav Rozloznik	PhD Tanja Dapa
Assistant Prof Pietro Dindo	Associate Prof Gemma Turnes Palomino	Dr Andrea Thorn	Associate Prof Yannick Copin	Dr Anshuman Maharana	Associate Prof Stelios Kazadzis	Dr Catherine Heymans	Dr Emilia Fornal	Dr Huizhen Zhang	Dr Elisabete da Cunha	Dr Dirk van Ormondt	Dr Carolyn Fischer	Dr Adrian Israelson	Dr Berke Gur	Dr Frank Snijkers	Dr Ira Didenkulova	Dr Emil Toader	Dr Declan Devine	Dr Markus Valtiner	Dr László Kóczy	Dr Helena Wiklund	Dr Mariya Soskova	Mr Pablo Bejarano	MSc Branimir Mrak	Dr Matthew Addicoat	Mr Kyle Allison	Mr Ondrej Holub	PhD Nebojsa Andric	MSc Christoph Scheidiger	Mr Sergii Bogomolov	PhD Student Behnam Vafadari	MSc David Dorantes Romero	PhD Student Alvaro Antonio Estupinan Donoso	PhD Student Fabio Luis Marques dos Santos	PhD Student Anders Rosengren	PhD Penny Nymark	PhD Student Antonia Hadjimichael	PhD Student Muhammad Altamash Ahmed Khan	PhD Student Maria Bartosova
Assistant Prof Raffaella Di Sante	Associate Prof Jacobo Feás	Dr Andreas Brunthaler	Dr Adrien Mestrot	Dr Anupam Sengupta	Dr Alexander Athanasiadis	Dr Catherine Preece	Dr Hanna Kurlanda	Dr Jian Li	Dr Filipe Ferreira	Dr Duncan den Boer	Dr Carrie Wright	Dr Alon Savidor	Dr Defne Aktas	Dr Franois Chung	Dr Ivan Agafonov	Dr Florica Constantinescu	Dr Deirdre Kilbane	Dr Martin Kocher	Dr Lorant Szekvolgyi	Dr Ing-Marie Back-Danielsson	Dr Mihail Mihaylov	Ms Constanza Sanhueza	MSc Dalibor Hršak	Dr Matthew Hall	Mr Peter Jones	Mr Radim Kral	PhD Student Aleksandar Stojanovic	MSc Elisabeth Kuhn	MSc Ievgen Obraztsov	PhD Student Ensieh Hosseini	MSc Georgina Villarreal	PhD Student Andrés Aldana	PhD Student Felipe Albuquerque	PhD Student Henriette Schwarz	PhD Student Guy Raoul Yondo Mine	PhD Student Ariana Polyviou	PhD Student MUHAMMAD ASJAD	PhD Student Natalia Kovacsova
Assistant Prof Simone Mascotto	Associate Prof Jose C. Martinez	Dr Andreas Busch	Dr Alain Rival	Dr Anurita Srivastava	Dr Alexandros Bartzas	Dr Cathy Fernandes	Dr Hanna Kurlanda	Dr Jie Chen	Dr Gabriela Silva	Dr Eline van Asperen	Dr Charles Knapp	Dr Anat Ben-Zvi	Dr Deniz Cakir	Dr Hans Vandierendonck	Dr Ivan Argatov	Dr Gabriela Diaconu	Dr Duncan McDonnell	Dr Martin Schepelmann	Dr Margit Pap	Dr Jan Svensson	Dr Milena Beshkova	Ms Laura Fernandez	MSc Diana Car	Dr Melissa Murphy	Mr Seyed Ali Nasseri	Mr Vaclav Bouse	PhD Student Ana Veljkovic	MSc Melissa Ines Gomis	MSc Ihor Berezin	PhD Student fatima yazdandoust	MSc Jose Flores-Uribe	PhD Student Andrés Vásquez Quintero	PhD Student Hugo SANTOS SILVA	PhD Student Katrine Zeeberg	PhD Student Jouni Heiskanen	PhD Student Costas Iordanou	PhD Student Muhammad Raza
Assistant Prof Vincenzo Cerullo	Associate Prof Jose Nunez-Yanez	Dr Andreas Dräger	Dr Alexandre Santerne	Dr Aparna Ratheesh	Dr Alexandros Petropoulos	Dr Charalambos Georgiou	Dr Henryk Korza	Dr Jie Li	Dr Ines Moura	Dr Ellen Van Kleef	Dr David Gehring	Dr Asher Wishkerman	Dr Deniz Gunduz	Dr Hon Fai Choi	Dr Kirill Postoutenko	Dr Gheorghe Tigan	Dr Emma Whelan	Dr Mathias Thaler	Dr Melinda Pirity	Dr Joakim Eriksson	Dr Nuri Ali Tahir	Ms Nayme Salas	MSc Ivan Mateljak	Dr Nicole Kane-Maguire	Mr Shiran Qiu	Ms Jana Noskova	PhD Student Dragan Opacic	MSc Renato Winkler	MSc Iurii Antoniuk	PhD Student Hatef Sadeghi	PhD ALFREDO FRANCO PEREZ	PhD Student Diana Ochoa	PhD Student Rafael Pilotto	PhD Student Mia Klinten Grand	PhD Student Lassi Hartikainen	PhD Student Efi Hadjixenophontos	PhD Student Muhammad Sulaman Nawaz
Assistant Prof Viviana Trezza	Associate Prof Juan-Carlos Sancho-Garcia	Dr Andreas Goldthau	Dr Alexis Peaucelle	Dr Aridaman Pandit	Dr Alexandros Savvaidis	Dr Charles Wilson	Dr Ilona Uryga-Bugajska	Dr Jiguang Liu	Dr Irina Franco	Dr Emmy Verschuren	Dr Elizabeth Syrkin	Dr Asif Efrat	Dr Deniz Ugur	Dr Ingrid Falque	Dr Maxim Ivanov	Dr Horia Ionescu	Dr Eoghan McGarrigle	Dr Michael Leitner	Dr Nagy Gabor	Dr Johan Öinert	Dr P Schmitz	PhD Adrian Gabriel Torres	MSc Ivana Ivandic	Dr Rachel Peat	Ms Lani Trenouth	Ms Lucie Tajcmanova	PhD Student Marko Ristic	MSc Samuel Wicki	MSc Oleksandra Ivashchenko	PhD Student IMAN MOADDEL HAGHIGHI	PhD Daniel Rios	PhD Student Jaime Gonzalez	PhD Student Thas Bassinello	PhD Student Trine Meldgaard	PhD Student Noora Tuovinen	PhD Student Marilena Hadjidemetriou	PhD Student Syed Abdul Qadir Shah
Associate Prof Claudia Maraston	Associate Prof Llorenç Serra	Dr Andreas Hejnol	Dr amandine béry	Dr Arjun Jain	Dr Alexios Antonopoulos	Dr Chris Vincent	Dr Iwo Bohr	Dr Jincheng Fan	Dr Isabel Jaco	Dr Farid El Oualid	Dr Emily Bruns	Dr Avi Caspi	Dr Devrim Kilinc	Dr Johan Smets	Dr Natalia Amelina	Dr Ioan Alexandru Ivan	Dr Eoin Brennan	Dr Nicole Kronberger	Dr Peter Balogh	Dr Jonatan Lenells	Dr Petar Varbanov	PhD Alfonso Soler Bistué	MSc Josip Franic	Dr Riia M. Chmielowski	Ms Lema Yousif	PhD Bohdana Dimitrovova	PhD Student Marko Vuckovic	MSc Sascha Reidt	PhD Andrii Kleshchonok	PhD Student Mahsa Fatahi	PhD Erick Garcia Garcia	PhD Student Liliana Avila Ospina	PhD Student Tulio Di Giacomo Toledo	PhD Thomas Hansen	PhD Student Petri Murto	Prof Christoforos Hadjicostis	Research Associate Sibgha Tahir
Associate Prof Elena Fantino	Associate Prof Manuel Alejandro Presa Soto	Dr Andreas Kühbacher	Dr Anne Blavette	Dr ashna bajpai	Dr Anastasios Papazafeiropoulos	Dr Christopher Hassall	Dr Iwona Zwierzak	Dr JING DONG	Dr Isabel Santos Magalhaes	Dr Felix Wensveen	Dr Enoma Omoregie	Dr Ayelet Baram-Tsabari	Dr Didar Dobur	Dr Karl Pauwels	Dr Natalia Ladygina	Dr Ioan Sebastian Buhai	Dr Gillian Mary Hendy	Dr Norbert Preining	Dr petra andits	Dr Karl Torstensson	Dr Tanya Kadiyska	PhD Diego Gabriel Oliva	MSc Miro Jurisic	Dr Robert Niven	Ms Sarah Seif El Nasr	PhD Eva Cechova	PhD Student Marko Vuckovic	PhD Catherine Suarez	PhD Kateryna Shavanova	PhD Student Maryam Hajji	PhD Ignacio Rangel	PhD Student Pablo Calderón	PhD Thais França	PhD Tonni Andersen	Prof Juho Rousu	Research Associate Artemis Kontou
Associate Prof Eric Guerci	Associate Prof Manuel Franco	Dr Andreas Pawlik	Dr Anne Burtey	Dr Ashok Kumar Nanjundan	Dr Andreas Drouzas	Dr Christopher Reynolds	Dr Jacek Herbrych	Dr Jingjing DU	Dr Joana Gonçalves	Dr Ferry Melchels	Dr Gonul Schara	Dr Carmit Tadmor	Dr Didem Akay Perdah	Dr Katrien An Heirman	Dr Nataliya Budaeva	Dr Ioana Codrina Maris	Dr Irial Glynn	Dr Peter Balazs	Dr Petra Dunkel	Dr Kristian Dreij	Dr Tatiana Stankova	PhD Ezequiel Lentz	PhD Antonija Jurak Begonja	Dr Robert Sewell	PhD Jean-Sébastien Parent	PhD Jan Kretinsky	PhD Student Masa Ivin	PhD Christof Dejung	PhD Sergii Kolodych	PhD Student Masoud Niknam	PhD Rosalba Icaza	PhD Student PAOLIN ROCIO CACERES VELEZ	Prof Marcus Polette	Research Associate Birgitte Rahbek Kornum	Prof Tapio Elomaa
Associate Prof Fabio Castiglionesi	Associate Prof Mauricio Suárez	Dr Andreas van Impel	Dr Anne Daulny	Dr Ashwini Maratha	Dr Andreas Flouris	Dr Christopher Thomas	Dr Janusz Petkowski	Dr Jintang Huang	Dr Joao Cabral	Dr Floris van den Eijnde	Dr Guthrie Partridge	Dr Clive Lipchin	Dr Ece Koc	Dr Katrien De Moor	Dr Nikolai Bobylev	Dr Irina Stanciu	Dr James O'Donnell	Dr Philipp Klaritsch	Dr Petra Mozes	Dr Patric Jonas Lindahl	Dr Teodora Ribarska	PhD Ezequiel Petrillo	PhD Dragomira Majhen	Dr Roland Crocker	PhD Mathieu Chouteau	PhD Kamil Olejnik	PhD Student Milena Nikolic	PhD Cyrille Girardin	PhD Student Alla Tereshchenko	PhD Student Mehdi Nikkhoo	PhD Student Alejandro Manzano Marín	PhD Student Sofia Riano Torres	Prof Sergio Henrique Faria
Associate Prof Federico Milano	Associate Prof Monica Calatayud	Dr Andreas Wenge	Dr Anne-Christine Trémon	Dr Atanu Jana	Dr Andreas Gofas	Dr Craig Richmond	Dr Jaroslaw Bryk	Dr Junkan Song	Dr João Nunes	Dr Geert Hamer	Dr Haley Swedlund	Dr Dan Grois	Dr Eda Celik-Akdur	Dr Katrien Kolenberg	Dr Nina Chumak	Dr Iulian Nor	Dr Jessica Smyth	Dr Roman Lichtenecker	Dr Ramon Hegedüs	Dr Per Ola Kristensson	Dr Todor Filchev	PhD Germán Sborlini	PhD Fedora Babic	Dr Sara Kyne	PhD Michael Shaver	PhD Katerina Liskova	PhD Student Milica Randelovic	PhD François LEFORT	PhD Student Artem Osypenko	PhD Student mehdi zohourian	PhD Student Andres Ledesma	PhD Student Susana Maria Sanchez Naranjo	Research Assistant Daphiny Pottmaier
Associate Prof Francesca Mazzia	Associate Prof Narcisa Martinez-Quiles	Dr Anja Kirsch	Dr Anne-Sophie Huart	Dr Baby VISWAMBHARAN	Dr Andreas Kaidatzis	Dr Daniel Colquitt	Dr Joanna Achinger-Kawecka	Dr Junquan Li	Dr Leonor Coutinho	Dr Geertje van Keulen	Dr Hermina Nedelescu	Dr david karasik	Dr Elvan Ceyhan	Dr Katrien Pype	Dr Olga Efremova	Dr Iustinian Bejan	Dr John Quinn	Dr Rupert Seidl	Dr Richard Rimanyi	Dr Sergey Sergeyev	Dr Vesselin Dekov	PhD Ignacio Schor	PhD Igor Baković	Dr Shauna Parkes	PhD Renée Fortner	PhD Klara Mareckova	PhD Student Mitar Simic	PhD Joelle Ruegg	PhD Student Ievgeniia Topolniak	PhD Student Mehrad Ahmadpour	PhD Student Carolina Rendón Barraza	PhD Sylvia Andrea Cruz Torres	Research Associate Gledson Emidio
Associate Prof Francesco Andriulli	Associate Prof Pedro Miranda	Dr Anja Rosenthal	Dr Antoine Marzin	Dr Benesh Joseph	Dr Angeliki Sgora	Dr David Adu Smith	Dr Joanna Chojnicka	Dr Lei Chen	Dr Liliana Lourenco Caldeira	Dr Gertrud J.M. van Loon	Dr Holly Wright	Dr Debbie Rand	Dr ERCAN YILMAZ	Dr Laura Merla	Dr Olga Zlydareva	Dr Maria Bostenaru Dan	Dr Julie Maguire	Dr Sebastian Maurer-Stroh	Dr Sándor Tóth	Dr Stefan Karlsson	Dr Violeta Velikova	PhD Javier Calles	PhD Karolina Maduna Valkaj	Dr Steven Barrow	PhD Student Alma Mohebiany	PhD Ladislav Smejda	PhD Student Nemanja Cvijanovic	PhD Jonas Richiardi	PhD Student Ivan Kucherenko	PhD Student Mina Mirsafaei	PhD Student Jose M. Beltran-Abaunza	Prof Guillermo Restrepo
Associate Prof Giorgio Chiandussi	Associate Prof Rosa Lopez	Dr Anja Schulze	Dr Arnaud Chiche	Dr Bhaswati Bhattacharyya	Dr Angelos Mantzaflaris	Dr David Barney Mathew Walker	Dr Joanna Wolszczak-Derlacz	Dr Lei Kai	Dr Lino Silva Ferreira	Dr Gertrude (Truus) Elise Maria Abbink	Dr Jodi Schneider	Dr Erez Levanon	Dr Esin Ozturk Isik	Dr Martin Wim Vincent Guilliams	Dr Robert Sych	Dr Mugurel Tolea	Dr Justin Tonra	Dr Siegfried Schobesberger	Dr Tamas Hegedus	Dr Tanja Hillberg	Dr Zhelyu Vladimirov	PhD Mariano Allo	PhD Maja Hrabak Paar	Dr Stuart Prescott	PhD Student Ariane Emami Riedmaier	PhD Lucie Homolova	PhD Student Stefan Bogdanovic	PhD Nicolas Maire	PhD Student Olena Chubach	PhD Student Mohamad Hasan Bahari	PhD Student Paola Kuri	Prof Jairo R. Montoya Torres
Associate Prof Giorgio Ganis	Associate Prof Victor Climent	Dr Anna Rieckmann	Dr Audrey Zannese	Dr BIDYUT KUMAR PATRA	Dr Anthoula Malkopoulou	Dr David Bradley-Williams	Dr Justyna Kulig	Dr Lei Shi	Dr Livia Santos	Dr Gokhan Ertaylan	Dr Jong Seto	Dr Esti Yeger-Lotem	Dr Esra Aksoy	Dr Nicolas Bouche	Dr Roman Nevshupa	Dr Neagoe Aurora	Dr Kieran Deasy	Dr Sigrun Badrnya	Dr Timea Csengeri	Dr Ylva Olsen	Mr Delyana Vasileva	PhD Marina Giannotti	PhD Marina Babic Cac	Mr Anthony Morphett	PhD Student Emily Burns	PhD Martin Cadik	PhD Student Teodora Pribic	PhD Renaud Jolivet	PhD Student Tetiana Olar	PhD Student Mohammad Rezaei	Prof Eugenia Corvera	Research Associate Julio Delgado
Associate Prof Giovanni Filatrella	BSc Antonio Garcia Guerra	Dr Anne Mai-Prochnow	Dr Aurelie Sophie Catherine Melchior	Dr Binod Parameswaran	Dr Antonios Bazigos	Dr Edward Green	Dr Justyna Walkowiak-Kulikowska	Dr Li Zhu	Dr Luis Pinho	Dr Harm Brouwer	Dr Joseph Scarpaci	Dr Eyal Maori	Dr Evren Ozarslan	Dr Nicolas Mine	Dr Roman Volchenkov	Dr Pruteanu E Eusebiu	Dr Linda Holland	Dr Simon Groeblacher	Dr Viktoria Jeney	Mr David Janzen	Mr Iordan Iordanov	PhD Student Cristian D'Alessandro	PhD Student Ana Tomicic	Mr Anton Lord	PhD Student Oscar Rahnama	PhD Martin Loucka	PhD Student Vladimir Ivosev	PhD Student Andrea Treyer	PhD Student Veronika Petrovych	PhD Student Naeimeh Laleh	Research Associate emilio barocio
Associate Prof Giuseppe Lipari	Dr Abel Ros Lao	Dr Annika Jahnke	Dr Aurélien Boisson-Dernier	Dr Chhayabrita Maji (Biswas)	Dr Antonis Mistriotis	Dr Elizabeth Evenden	Dr Karolina Pulka	Dr Liang ZHENG	Dr Manuel Joao Mendes	Dr Harro van Asselt	Dr Kateryna Makova	Dr Gali Prag	Dr Evrim Besray Unal	Dr Nicolas Van Goethem	Dr Sergey Semenov	Dr Radu Tudor Ciornei	Dr Lydia Lynch	Dr Simone Moser	Dr Zsolt Karpati	Mr Joakim da Silva	Mr Lyubomir Mishkov	PhD Student Debora Swistun	PhD Student Doris Popovic	Mr Gilman Toombes	PhD Student Tracy Cheung	PhD Michaela Rothova	Prof Dragan Jocic	PhD Student Huarda Valdes-Laribi	PhD Student Victor Tsvirkun	PhD Student Siamak Farajzadeh Khosroshahi	Research Associate VICTOR MANUEL NAVARRO TABLEROS
Associate Prof Jacqueline Visconti	Dr Abraham Casas Garcia-Minguillan	Dr Antje Feller	Dr Bazin Jrmie	Dr Deepak Dubal	Dr Areti Mourka	Dr Ellie Dobson	Dr Krzysztof Bolejko	Dr Linhai Tian	Dr Manuel Melo	Dr Heidi Lesscher	Dr Kathleen Middleton	Dr Guy Doron	Dr Firat Cengiz	Dr Olivier Giacomin	Dr Tatiana Plotnikova	Dr Ramona Cernat	Dr Lynn Dennany	Dr Stefan Andreas Köstler	Dr Zsuzsanna Balogh-Brunstad	Ms Annica Brannlund	Mr Stefan Bozhanov	PhD Student Diego Nicolás de Panis	PhD Student Duje Veic	Ms Vivianne Goosens	PhD Wen-Hong Zhu	PhD Student Martin Pekar		PhD Student Patrik Winiger	Prof Anatoliy Andrushchak	PhD Student Soheila Aghlmandi
Associate Prof Katia Gallo	Dr Adrià Tauste Campo	Dr Astrid C. Wittmann	Dr Benjamin Michel Edmond Dehay	Dr Deepak Nair	Dr Aristides Lytras	Dr Emily Lydgate	Dr Lukasz Kilanski	Dr MENG WANG	Dr Margarida Cardoso Moreira	Dr Henkjan Gersen	Dr Kathleen O'Brien Ramirez	Dr Guy Ramon	Dr Gurbuz Comak	Dr Rogier De Langhe	Dr Valery Petrykin	Dr Ramona Danac	Dr Mark Matthews	Dr Stefan Kubicek	Mr Andras Szabo	Ms Elin Rundquist	Ms RADOSTINA GENOVA	PhD Student Julian Dajczgewand	PhD Student Ines Tomasek	PhD Abigail Clements	Prof Richard Johnston	Prof Jiri Klemes		PhD Student Yoran Beldengrün	Prof Sergei Dzyadevych	Research Associate Gholamreza Shayeganrad
Associate Prof Ladislau Matekovits	Dr Ainhoa Urtizberea	Dr Axel Ruehl	Dr Benoit Cordonnier	Dr Devdatta Majumder	Dr Athanasios Barlas	Dr Frances Guerin	Dr M Ghaemi	Dr Meng Yu	Dr Margarida Garrido	Dr jacqueline klooster	Dr Katryna Cisek	Dr Haim Yacobi	Dr Huseyin Boyaci	Dr Ronald Denaux	Dr Vladimir Dotsenko	Dr Stefania Bobaru	Dr Michael Monaghan	Dr Stefan Mitsch	Mr Andras Zentai	MSc Mikael Berglund	MSc Hristo Hristoskov	PhD Student Justo José Roberts	PhD Student Ivan Jajic	PhD Ben Babourina-Brooks	Prof Scott MacLachlan	Prof Marek Jindra		PhD Yama Tomonaga	Research Assistant Dar'ya Kondrakhova	Research Associate Omid Arjmandi Tash
Associate Prof Marcella Milana	Dr Aitor Hornes	Dr Bastian Manschwetus	Dr Benoit Salvant	Dr Dhanasekaran Vikraman	Dr Athanasios Giannitsis	Dr Fraser Cunningham	Dr Magdalena Grabowska	Dr Minmin Shen	Dr Maria Graça Neves	Dr Jan Baas	Dr Kelsey Dyez	Dr Inon Scharf	Dr Isik Kuscu Bonnenfant	Dr Ruben Snellings	Dr Yana Volkovich	Mr Adrian NEACSA	Dr Michael Sinding	Dr Stefan Spirk	Mr Gergely Janos Szollosi	PhD Anders Lanzén	MSc Nikolay Petrov	PhD Student Pablo Vitale	PhD Student Ivana Kajic	PhD Luke Allsopp	Research Associate F-X Campbell-Valois					Research Associate Seyed Ali Ghoreishian Amiri
Associate Prof Marco Salemi	Dr Alba Tres Oliver	Dr Bela Ernest Bode	Dr Bernadette Montanari	Dr Dileep Koul	Dr Athanasios Lourbopoulos	Dr Geoffrey Gregson	Dr Magdalena Kowacz	Dr Nan Li	Dr Maria José Ribeiro Gomes	Dr Jan-Willem Veening	Dr Kirsten Hanson	Dr Iris Lavi	Dr Isil Oz	Dr Steven Houben	Mr Aleksey Mikhaylov	Mr Bogdan Duma	Dr Michael Walsh	Dr Stephan Reitinger	Mr Kalman Toth	PhD Anne-Charlotte Johansson	MSc Pavlina Georgieva Mihaylova	PhD Student Sebastián Matías Gastaldi	PhD Student Ivana Nina Unković	PhD Nial Gursanscky
Associate Prof Marco Segala	Dr Albert Casanovas	Dr Benedikt Beckmann	Dr Bertrand Frechede	Dr Dilip Venkatrao Jarikote	Dr Betty Mousikou	Dr George Metcalfe	Dr Magdalena Montowska	Dr Nan LIN	Dr Mario Gomes-Pereira	Dr Jappe Eckhardt	Dr Kristin Nicodemus	Dr Irit Bar-Kochva	Dr Mehmet Demiray	Dr Stevens Kristof	Mr Alexey Merezhin	Mr Dan Savu	Dr Nicole Grimes	Dr Thomas Kador	Mr Lajos Szalmas	PhD Erika Boyenga Ödlund	MSc Petya Ilieva-Trichkova	PhD Vanesa Tognetti	PhD Student Marija Kosutic	PhD Spencer Maughan
Associate Prof Maria Simonetta Bernabei	Dr Albert Gasull Morales	Dr Benjamin Kienzle	Dr Betty Queffelec	Dr Ekambaram Ramesh	Dr Christos Anastopoulps	Dr Geraint Harker	Dr Malgorzata Goclowska	Dr nengye liu	Dr Miguel Branco	Dr Jeffrey Bajramovic	Dr Leah Ashe	Dr Jonathan Belmaker	Dr Mehmet Haluk Sengun	Dr Stijn Mertens	Mr Alexey S. Salasyuk	Mr Erol Licsandru	Dr Olga Korostynska	Dr Thomas Kroneis	Mr Peter Tamas Kovacs	PhD Eva Irene Bontell	PhD Deyan Levski	PhD Ximena Goldberg	PhD Student Markus Martincic	PhD Student Konrad Wilkens Flecknoe-Brown
Associate Prof maria vittoria cubellis	Dr Albert Isidro Llobet	Dr Benjamin Weger	Dr Bogdan mateescu	Dr Ghulam Mustafa Khawaja	Dr Christos Apostolakis	Dr Graeme Alexander Hayes	Dr Malgorzata Siennicka	Dr Peng Han	Dr Mónica Martínez Haro	Dr Jeroen Witteveen	Dr Margaret Zellers	Dr Lior Shaltiel	Dr Melis Serefoglu	Dr Sven Casteleyn	Mr Anton Nalitov	Mr Faustin-Laurentiu Roman	Dr Padraig Corcoran	Dr Tobias Berka	Ms Csilla Kato	PhD Helena Falkenberg	PhD ELITSA DZHONGOVA	Prof Horacio S. Wio	PhD Student Martina Petrovic-Hunjadi	Prof John Zeleznikow
Associate Prof Mauro Pineschi	Dr Alberto Miranda Bedate	Dr Bettina Fischer-Genz	Dr Brigitte Beauzamy	Dr Gokul Bala	Dr Christos Chochos	Dr Gregory Mills	Dr Marcin Balcerzyk	Dr Qiang Zhang	Dr ngela Novais	Dr Jolanda Van der Noll	Dr Mark Pogson	Dr Menahem Yeari	Dr Mine Orlu Gul	Dr Thomas Lombaerts	Mr Ivan Popov	Mr Ionut Ichim	Dr Patrick Walsh	Mr gor bor	Ms Judit Prihoda	PhD Ida Jackson	PhD Evgeniya Petrova	Prof Pablo Puleston	PhD Student Mateja Kralj	Prof Leszek Maciaszek
Associate Prof Nicola Galesi	Dr Albor Dobon	Dr Bin Ma	Dr Camille Schmoll	Dr Gorakh Yellol	Dr Christos Fountoukis	Dr Gursharan Kalsi	Dr Marcin Moskalewicz	Dr Qingxi Fu	Dr Patricia Hansen	Dr Joost Rommes	Dr Meghan McAteer	Dr Micha Fridman	Dr Oguz Demirci	Dr Thomas Zadrozny	Mr Olga Gromasheva	Ms Claudia Iacob	Dr Paul Griffin	Mr Michael Klein	Ms Katalin Sari	PhD Keira Melican	PhD Georgi Beev	Prof Veronica Dodero	PhD Student Sime Brkic	Prof Steven Freeland
Associate Prof Nicola Lucchi	Dr Alejandra Bruna	Dr Birgit Esser	Dr Carole Leguy	Dr HARIKRISHNA EROTHU	Dr CHRISTOS KAMPERIDIS	Dr Hamish Gordon	Dr Michał Berent	Dr Qiong Shen	Dr Raquel Conceicao	Dr Jos van Geffen	Dr Melinda Harman	Dr Michael Berger	Dr Oktay Onur Kuzucu	Dr Tim Duerinck	Mr Sergey Sosnovsky	Ms Corina Dima	Dr Paul Harris	Mr Richard Penninger	Ms Magdi Birtha	PhD Magnus Andersson	PhD Irena Andonova	Research Assistant Carolina Diaz	PhD Student Tomislav Pozaic
Associate Prof Raffaele Casa	Dr Alejandro Díaz-Moscoso	Dr Birke Bartosch	Dr Carole Smadja	Dr Jaideep Saha	Dr Christos Mitsis	Dr Hayley Hung	Dr Michal Karpinski	Dr Shanshan Weng	Dr Ricardo Pinto de Lima	Dr Josien van Wolfswinkel	Dr Michael Tomlinson	Dr Michael Milyavsky	Dr Osman Gulseven	Dr Timothée Demont	Mr Sergey Turtaev	Ms Damiana-Gabriela Otoiu	Dr Peter Crooks	Mr Simon Weinberger	Ms Zsofia Ocsovszky	PhD Patrick Reijnst	PhD Lilia Dimova	Research Assistant María Eugenia Burgos	PhD Student Vedran Bozicevic
Associate Prof Raffaele Velotta	Dr Alejandro Gonzalez Tudela	Dr Bjorn Schumacher	Dr Caroline Barelle	Dr Jetendr Shamdasani	Dr Chrysanthi Ainali	Dr Helen King	Dr Michal Malecki	Dr Shuguang Yuan	Dr Rute Fonseca	Dr Karin Struijs	Dr Plamen Nikolov	Dr Michal Leskes	Dr Ozlem Kayhan Pusane	Dr Tom Mestdag	Mr Vital A. Yazerski	Ms Liliana Gtin	Dr Roisin Moriarty	Mr Therese Wohlschlager	Ms Zsuzsanna Nagy	PhD Petter Johansson	PhD Lina Gergova	Research Assistant Silvia Menchon	PhD Student Vesna Babaja
Associate Prof Simone Ferriani	Dr Alejandro Perez de Luque	Dr Bojan Resan	Dr Caroline Cleroux	Dr Kanchan Anand	Dr Constantinos Antoniou	Dr Henrik Gollee	Dr Michal WOZNIAK	Dr Su Ma	Dr Sandra Lucas	Dr Kim Berlo	Dr Robert Messinger	Dr Micki Limor Eisenman	Dr Pinar Burcu Guner	Dr Tom Ruts	Ms Anna Mikaelyan	Ms Sanda Lefteriu	Dr Roisin Owens	Ms Juliane Metzger	PhD Akos Kovacs	PhD Petter Ljungman	PhD Simeon Vidolov	Research Assistant VIRGINIA HELENA ALBARRACIN	Prof Ivan Slapnicar
Associate Prof Vanina Jasmine Torlo	Dr Alejandro Vidal Lopez	Dr Brigitte Vollmer	Dr Caroline Emilie Paul	Dr Karthik Balachandran	Dr Despina Triantou	Dr hossein elbadawy	Dr Mirka Pawlyta	Dr Tao Jin	Dr Sara Ricardo	Dr Klaas-Jan Tielrooij	Dr Samuel Fletcher	Dr Mona Dvir-Ginzberg	Dr Seda Keskin	Dr Valérie Gabelica	Ms Evgenia Dolgova	Ms Silvia Necsulescu	Dr Sarah Hudson	Ms Nerina Weiss	PhD András Zlinszky	PhD Student Björn Morén	PhD Stanimira Taneva	Research Associate Cristian Kunusch	Prof Nils Paar
Associate Prof Vittoria Raffa	Dr Alex Bayes	Dr Broer Teichert	Dr Caroline Pénicaud	Dr Kashmir Singh	Dr Dikaia Chatziefstathiou	Dr Irina Grigorieva	Dr Monika A. Kusiak	Dr Wanlin Wang	Dr Sofia Morais	Dr Koen Leurs	Dr Sapun Parekh	Dr Nehama Lewis-Persky	Dr Serif Aziz Simsir	Dr Veerle Huvenne	Ms Inna Pertsovskaya	MSc Codrut Dan	Dr Shane McCorristine	MSc Alexander Schiftner	PhD Anna Székely	PhD Student Chitralekha Mohanty	PhD Stefan Vatev
Dr Abdelouahab El Kharbachi	Dr Amalio Fernandez-Pacheco	Dr Carolin Goerzig	Dr Cecile Bats	Dr Kiran Kumar Chereddy	Dr Dimitrios Presvytes	Dr James Best	Dr Monika Zawadzka	Dr Wei Yan	Dr Susana Fernandes	Dr Lotte Gerritsen	Dr Sarah Long	Dr Nicolas Waldmann	Dr Tomris Cesuroglu	Dr Viola Rosemeyer	MSc Tatiana Statsenko	MSc Tanase Laurentia	Dr Stephen Thorpe	MSc Doris Höglinger	PhD Attila Remenyi	PhD Student Henrik Löfvall	PhD Student Kristiana Sto
Dr Adriana Trapani	Dr ANA BELEN DAVILA IBANEZ	Dr Caroline v. Dresky	Dr Céline Diaz	Dr Koushik Pal	Dr Dimitrios Sofikitis	Dr James McDermott	Dr Patrycja Kowalska	Dr Weiwei Cai	Dr Tiago Rodrigues	Dr Maartje van Gelder	Dr Seth Coffelt	Dr Nissim Otmazgin	Dr Ugur Ural	Dr Wim Van Rossom	PhD Alexandr Velikii	MSc Victor Mocioiu	Dr Stephen Wilson	MSc Iris Leitner	PhD Balazs Bodo	PhD Student Illapha Cuba Gyllensten	PhD Student Maria Evtimova
Dr Alberto Dalla Rosa	Dr Ana Jorge Finnigan	Dr Christian Bolzmacher	Dr Celine, Michelle, Regine Marionneau	Dr Koustubh Vaze	Dr Dimitrios Vamvatsikos	Dr James Richard Thorley Seddon	Dr Pawel Dzygiel	Dr Wenjie Liao	Mr CARLOS CORREIA	Dr Marco Bontje	Dr Steve Ross	Dr Niv Papo	Dr Veli Cengiz Ozalp	Dr Yves Verhertbruggen	PhD Anatoly Shestakov	PhD Aurora Daniela Neagoe	Dr Tadhg O' Mahony	MSc Markus Maier	PhD Balazs Varga	PhD Student jenny wickham	PhD Student Yoana Vergilova
Dr Alberto Lepore	Dr Ana Pizarro	Dr Christian Deutsch	Dr chantal roubinet	Dr Kunal Roy	Dr Dimitris Milakis	Dr James Spelling	Dr Piotr Cywinski	Dr Wenlian Lu	Mr Flvio Miranda	Dr Marianne Boes	Dr Teague O'Mara	Dr Ofer Wilner	Mr Ahmet Aykac	Mr Cedric Boeckx	PhD Andrey Komarov	PhD Bogdan Marian Tofanica	Dr Tanya Cassidy	MSc Martin Barisits	PhD Balint Kintses	PhD Student Klara Junker	Prof Atanas Pavlov
Dr Alberto Marocchino	Dr Ana Sanz Aguilar	Dr Christian Eichinger	Dr Charaf Benarafa	Dr Lakxmi Subramanian	Dr Dimitris Papanastasiou	Dr Jeffrey S. Petty	Dr Piotr Milos	Dr XIAOGUANG LIU	Mr Jorge Gonçalves	Dr Marieke Liem	Dr Thomas Kent	Dr Ohad Gal-Mor	Mr Ali Dinler	Mr David Anciaux	PhD Anton Manoylov	PhD Carmen Tanase	Dr Tessa Pocock	MSc Thomas Rabl	PhD Bela Z Schmidt	PhD Student Love Mattias Cederström	Prof Petia Dineva
Dr Alberto Ripari	Dr Ana Valero Rello	Dr Christian Jogler	Dr Chloé Bonnineau	Dr MANIS CHAUDHURI	Dr Dimosthenis Karatzas	Dr Jennifer Hemmings	Dr Piotr Sulkowski	Dr Xuhui Dong	Mr Nuno Nogueira	Dr Marjoleine Sloos	Dr Traci Wilson	Dr Ophir Auslaender	Mr Aylin Erdem	Mr Dries Vervecken	PhD Boris Voronin	PhD Elfrida Mihaela Carstea	Mr Alan Kavanagh	PhD Bernhard Weicht	PhD Cecilia Hornok	PhD Student Sofie Wendel	Prof Vladimir Pericliev
Dr Alberto Vanzo	Dr Ana Vazquez Alejos	Dr Christian Reibe	Dr Christophe Lopez	Dr MANISH KUMAR	Dr Dionysios Chartoumpekis	Dr Jessica Johnson	Dr Piotr Surowka	Dr Yajuan He	Mr Pedro Bizarro	Dr Marloes Renee Tijssen	Dr Tracy Eleanor Northup	Dr Orit Mualem	Mr Deniz Gunes	Mr Geert Verhoeven	PhD Daria Romanyuk	PhD Laura Urdes	Mr Barry Guihen	PhD Christian Hoelbling	PhD Donat Alpar	PhD Wessen Maruwge	Research Associate Rositsa Dzhekova
Dr Aldo Rona	Dr Andrea Blanco Redondo	Dr Christian Wozny	Dr christophe tarabout	Dr Mohammad Yusuf Shafi Mulla	Dr Efthymios Nikolopoulos	Dr Jeyanthy Eswaran	Dr Piotr Wisniowski	Dr Yaozu Liao	Mr Pedro Pinto	Dr Martinus Zwijnenburg	Dr Veronica Morales	Dr Ram FRIDLICH	Mr Huseyin Kocak	Mr Jan Troost	PhD Maksim Shivokhin	PhD Liliana Velea	Mr Barry Ridge	PhD Ernst Aichinger	PhD Katalin Solyom	Prof Anders Backlund
Dr Alessandra Bernardi	Dr Andres Hidalgo Alonso	Dr Christine Feig	Dr Cindy Canale	Dr Mohanakrishna Gunda	Dr Efthymios Rouvalis	Dr Jo Vearey	Dr Piotr Zwiernik	Dr Yishan Zheng	Mr Rui Quintas	Dr Max Schlager	Dr Vincent Holmberg	Dr Raz Zarivach	Mr Levent Kirval	Mr Kristiaan Wouters	PhD Nikita Toropov	PhD Luminita Ciolacu	Mr Daniel Carey	PhD Evelyn Jantscher-Krenn	PhD Kristof Kovacs
Dr Alessandra Bigongiari	Dr Ángel Ferrero-Serrano	Dr Christine Mössinger	Dr Claire Chausade	Dr Mysore Tejesvi	Dr Eirini Anastasiadou	Dr Johanna Barry	Dr Przemek Tomalski	Dr Yongli Li	Ms Andreia De Jesus Amaral	Dr Mirjam Goethals	Mr Chance Coughenour	Dr Roi Cohen Kadosh	Mr Nimet Kerimoglu	Mr Stijn Vercammen	PhD Oleg Proselkov	PhD Marilena Plesu	Mr Eimear Dunne	PhD Neda Motamedi Shad	PhD Lajos Mátés
Dr Alessandra Conversi	Dr Angel Medina-Vaya	Dr Christoph Bock	Dr Claire Marie Colomb	Dr Nabeel Mancheri	Dr Eleftheria Georganti	Dr John Durrell	Dr Przemyslaw Osocha	Dr Yuan Yuan	Ms Carina Freitas	Dr Mirjam Zegers	Mr Daniel Powell	Dr Ron Dabora	Mr Osman Ceylan	Mr Timothee Demont	PhD Olga Gavrichkova	PhD Remus Gabriel Anghel	Mr ferdia bates	PhD Peter Hauser	PhD Lel Eory
Dr Alessandro Fiori	Dr Anna Laromaine Sagué	Dr Christoph Haug	Dr Claudine Patteux	Dr Nachiket Kashikar	Dr Elena Anastasaki	Dr John Goold	Dr Radek Lapkiewicz	Dr Yuanyuan Chen	Ms Catarina Assis	Dr nijso beishuizen	Mr G. Anthony Giannoumis	Dr Ronen Durst	Mr Semih Turkaya	Mr Toon Kuppens	PhD Petr Yatsyshin	PhD Simona Betianu	Mr Jim Dowling	PhD Sophie Schussek	PhD Mate Gyimesi
Dr Alessandro Jedlowski	Dr Anna Sanchez Vidal	Dr Christoph Klenk	Dr Damien Coudreuse	Dr Nandanapalli Koteeswara Reddy	Dr Elena Papageorgiou	Dr John Lavagnino	Dr Radoslaw Barczak	Dr Yue Huang	Ms Ines Alves	Dr Paula Koelemeijer	Mr Matthew Boucher	Dr Rotem Edgar	Ms Fatma Dinc	Ms Benedikte Custers	PhD Roman Katerinenko	PhD Stefan Stancu	Ms Deirdre O'carroll	PhD Stefan Mittermayr	PhD Peter Racz
Dr Alessandro Metlica	Dr Anna Vilalta	Dr Christoph Wannek	Dr Damien Dambournet	Dr Narayanan Madaboosi Srinivasan	Dr ELENI VERGADI	Dr John Lock	Dr Rafal Szmigielski	Dr Yuhong Wang	Ms Ines Ramos	Dr Peter Hochs	Mr Robert Huffaker	Dr Shaul Katzir	Ms Ildem Sanli	Ms Jenny Neukermans	PhD Shamil Shikhaliev	PhD Student Alexandru Lixandru	Ms Fiona Murphy	PhD Stephan Malbrunot-Ettenauer	PhD Student Attila Gábor
Dr Alessandro Stella	Dr Antón Vila-Sanjurjo	Dr Claudia Rueckert	Dr Damien Subit	Dr Naresh Kumar Gunasekar	Dr Elisabeth - A. DIAMANTOPOULOU	Dr John Mathews	Dr Sebastian Sapeta	Dr zhiguo li	Ms Marina Santos	Dr Peter van Ruitenbeek	Ms Anna Sowa	Dr Shaul Shalvi	Ms Mine Ince	Ms Roseline Johanna Margareta Remans	PhD Student Alexander Podlozhnyuk	PhD Student Alin Ionas	MSc Aoife Corcoran	PhD Student Andreas Raspotnik	PhD Student Diána Hudecz
Dr Alessandro Torcini	Dr Antoni Ivorra	Dr Corinna Kaul	Dr daniel lafitte	Dr Natasha Mhatre	Dr Emmanouil Milakis	Dr John Moulden	Dr Tomasz Ratajczyk	Dr zhihan lu	Ms Marta Adelina Miranda Mendes	Dr piet kommers	Ms Catherine Moroski Erkul	Dr Simon Barak	Ms sahizer samuk	Ms Sylviane Lebon	PhD Student Alexey Alekhin	PhD Student Andreea Iorgu	MSc Aoife Healy	PhD Student Anna Holderbaum	PhD Student Melinda Mihály
Dr Alessandro Vannini	Dr Antonio Blanco-González	Dr Dagmar Meyer	Dr David CEBRON	Dr Nilesh Madhu	Dr Emmanouil Skantzakis	Dr Jonathan Shock	Dr Tomasz Wilanowski	Dr Zhongbao Jian	Ms Rute Da Conceicao Tavares Andre	Dr Ramon Arens	Ms Emily Newton-Tanzer	Dr Sol Efroni	MSc Cigdem Yucel	MSc Léna Cauchie	PhD Student Aminat Ramazanova	PhD Student Aura Moldovan	PhD Andrew Lindsay	PhD Student Denny Kollanur	PhD Student Zsofia Buttel
Dr Alessandro Zenesini	Dr Antonio de Ugarte Postigo	Dr Damian Herz	Dr David Sauzin	Dr Nishanth Dongari	Dr Evangelia Chrysina	Dr Joy Watts	Dr Witold Musial	Dr Zhugen Yang	MSc Alessa Silva	Dr Rebecca Schaefer	Ms Indira Chivukula	Dr Taleb Mokari	MSc derya canbaz	MSc Ruben Gerrits	PhD Student Anastasya Shilova	PhD Student Carmen Andrada Mak	PhD Cathal Kilcline	PhD Student Philipp Sommerhuber	PhD Tibor Papp
Dr Alessia D'Orazio	Dr Antonio Garcia Garcia	Dr Daniela Gavagnin	Dr Delphine Rocklin	Dr Niti Kumar	Dr Evangelos Kanoulas	Dr Julius Ross	Dr Wojciech Linhart	Dr Zhuofei Xu	MSc Anabela Areias	Dr Reindert Nijland	Ms Judith Watson	Dr Tamar Juven-Gershon	MSc GOKHAN DEMIRCI	PhD Anne-Catherine Wéra	PhD Student Anna Isakova	PhD Student Corina Balaban	PhD Gillian Hendy	PhD Student Reinhard Schweitzer	PhD Zoltán Osváth
Dr Alessia Dimartino	Dr Antonio Isaac Fernandez Dominguez	Dr Daniela Rosenow	Dr Didier Talamona	Dr Nivas Babu Selvaraj	Dr EVI MARGARITIS	Dr Jun Ren	Dr Wojciech Solowski	Mr Ajiguli Nuermaimaiti	MSc André Santos	Dr Richard Groen	Ms Kari Lipschutz	Dr Tamir Klein	MSc Imge Namal	PhD Bernard Thienpont	PhD Student Chubar Nikolay	PhD Student Cristina-Claudia Paraschivescu	PhD Katharine Farrell	Prof Alexandra Muellner-Riehl	PhD Zoltan Wiener
Dr Alessia Pasquazi	Dr Antonio J Torija Martínez	Dr Daphne Gondhalekar	Dr Edith Joseph	Dr Pallab Bhowmick	Dr Filimon Roukoutakis	Dr Karen Hardy	Mr Andrzej Nowak	Mr Chaoyu Li	MSc Carla Ribeiro	Dr Rik Ossenkoppele	Ms Kristina Havas	Dr Tsaffrir Zor	MSc Muhammed Hasan Kilinc	PhD Colas Schretter	PhD Student Daria Semenova	PhD Student Dorina Baltag	PhD Keelin O'Driscoll	Prof Bernhard Rupp	PhD Zsuzsanna Polgár
Dr Alessio Agostini	Dr Antonio José Signes Pastor	Dr Darja Reuschke	Dr Edouard Martins	Dr Parthapratim Munshi	Dr Fotios S. Milienos	Dr Kate Anne Woodcock	Mr Hubert Hadera	Mr Chengjun YU	MSc Cátia Fidalgo	Dr Sara Jabbari-Farouji	Ms Sally Seidel	Dr Udi Qimron	MSc Ozgun Yuva Oz	PhD Francois Gaascht	PhD Student Elena Goltseva	PhD Student Georgiana Turculet	PhD Matthew Haugh	Prof Christian Haefke	Prof András Dinnyés
Dr Alessio Caratti O Garatti	Dr Antonio Marcial Escudero Lirio	Dr David Schwefel	Dr Edouard Pesquet	Dr Pradeep Rangrao Patil	Dr George Goussetis	Dr Katie Palmer	Mr Jan Misiak	Mr Fang Gao	MSc Diana Ribeiro	Dr Sara Schaafsma	Ms Tiffany Rivera	Dr Valery Krizhanovsky	MSc sebnem baysec	PhD Jasper Wouters	PhD Student Elena Zhirukhina	PhD Student Ibrahim Ramadan	PhD Michael Daly	Prof Ekkehart Tillmanns	Prof Endre Szécsényi
Dr Alice Cicirello	Dr Antonio Melndez	Dr Dirk Ahlers	Dr Edwige Moyroud	Dr Prasant Misra	Dr GEORGE KONNIS	Dr Kevin James Fraser	Mr Marek Brandys	Mr Guanghui Cui	MSc Margarida Sofia Nobre	Dr Sietske Helder	MSc Michael Schoen	Dr Vitaly Gitis	MSc Zeynep Eren Ghiani	PhD Liesbet Lieben	PhD Student Ilia Sergachev	PhD Student Ioana-Alexandra Coman-Lohi	PhD Student Aislinne Freeman	Prof Justus Piater	Prof Peter Erdos
Dr Allegra Cattani	Dr Arantxa VILALTA-CLEMENTE	Dr Dirk Paul	Dr Elisa Guillermain	Dr Praveen Kumar	Dr George Lambrinidis	Dr Laura Foster	Mr Michal Ociepa	Mr Guangrong Zou	MSc Miguel Nunes	Dr Sijmen Schoustra	MSc Robert Chavez	Dr Yaacov Lawrence	PhD Balca Mardin	PhD Maarten Mennes	PhD Student Inga Tarasenko	PhD Student Magda Ulceluse	PhD Student Andrea Broderick	Prof Martin Risak	Prof Zoltan Barta
Dr Amalia Di Girolamo	Dr Arnau Rios	Dr Dominic Winter	Dr Emeline Barbet-Massin	Dr Praveen Vakayil Karthikeyan	Dr GEORGIOS KARANIKOLOS	Dr Laura Kelley	Mr Peter Lewinski	Mr Hao Liu	MSc Rui Guimaraes	Dr Simon Tindemans	PhD Amy Iler	Dr Yael Parag	PhD Dicle Dövencioğlu	PhD Martin Vancoppenolle	PhD Student Ivan Yamshchikov	PhD Student Mirela Petrascu	PhD Student Aodhan Kelly	Research Assistant Florian Pausch
Dr Andrea Arcangeli	Dr Aurelio Moya Garcia	Dr Dominik Heiss	Dr Emily Julie Cottrell	Dr Priyanka Tiwari	Dr Gerasimos Sykiotis	Dr Lauren Owen	Ms Agnieszka Kucharska	Mr Jianqiang Ma	MSc Sonia Alves	Dr Sjoerd de Vries	PhD Anjali Bhatara	Dr Yael Roichman	PhD Evrim Baran	PhD Peter Dynoodt	PhD Student Konstantin Melnikov	PhD Student PAVEL ILEANA	PhD Student Brian Conroy
Dr Andrea Benaglia	Dr Beatriz Hernandez Juarez	Dr Dominik Luecke	Dr Emmanuel Nicolas	Dr Rajat Gupta	Dr Giorgos Stoilos	Dr Lisa Wingate	Ms Anita Sek	Mr Junpei Zhong	PhD Afonso Duarte	Dr Stanley Lai	PhD Anjali Raja Beharelle	Dr Yifat Glikmann-Johnston	PhD Meric Batioglu Pazarbasi	PhD Selma Boulenouar	PhD Student Maksim Fomin	PhD Student Silviu-Sorin Tuca	PhD Student Daniel O'Brien
Dr Andrea Bertoldi	Dr Belinda Gallardo	Dr Dunja Lamatsch	Dr Eric Buchlin	Dr Rajesh Arora	Dr Haris Saslis-Lagoudakis	Dr Liz Moores	Ms Dominika Przybylska	Mr Junzhi Liu Liu	PhD Ana Rita Santos	Dr Steven Knoop	PhD Ashleigh Nugent	Dr Yoav Medan	PhD selman tunc yilmaz	PhD Student Annelies Vaneycken	PhD Student Maria Tudorovskaya	PhD Student Simina Aurelia Rebegea	PhD Student Darren McDonnell
Dr andrea filippetti	Dr Berta Biescas-Gorriz	Dr Edda Kastenhuber	Dr Eric Chevet	Dr Rajeswaran Rajendran	Dr Ioanna Evdokia Galani	Dr Loraine Bacchus	Ms dorota radecka	Mr Liangquan Zhang	PhD Ana Sousa Manso	Dr Tessa Quax	PhD Boian Alexandrov	Dr Yonatan Sivan	PhD Student Aksel Erbahar	PhD Student Charlotte Roose	PhD Student Marina Chuchko	PhD Student Sorin Cebotari	PhD Student Deirdre Cassidy
Dr Andrea Maiorano	Dr Blanca Hernández Ledesma	Dr Elena Seiradake	Dr Eric Claude Tyrode	Dr Rajib Ranjan Maiti	Dr Ioanna Lykourentzou	Dr Louise Hardwick	Ms Ewa Bauman	Mr Pei Zhang	PhD Ana Viseu	Dr Tim den Hartog	PhD Boumediene Hamzi	Mr Eran Greenberg	PhD Student Betul Yalcin	PhD Student David Stevens	PhD Student Maxim Cherkashin	PhD Student Victor Vladareanu	PhD Student Emma McDermott
Dr Andrea Passamonti	Dr Carles Galdeano	Dr Ellen Harlizius-Klück	Dr Estelle Palluel	Dr Raju Jannapu Reddy	Dr Ioannis Binietoglou	Dr Louise Kemp	Ms Ewelina Guca	Mr Qian Lin	PhD Carolina vila	Dr Tim van Erven	PhD Brett Zografos	Mr Omri Warshavski	PhD Student Ezgi Kayhan	PhD Student Frederic Collonval	PhD Student Natalia Sherina	PhD Vlad Popovici	PhD Student Enda Joseph Clinton
Dr Andrea Piccolroaz	Dr Carlos García Argos	Dr Elmar Kriegler	Dr Florence Bergeaud-Blackler	Dr Raju Jannapureddy	Dr Ioannis Bourmpakis	Dr Lucy Alford	Ms Joanna Hoffman	Mr RUI YANG	PhD Catarina Ferreira	Dr Tjakko van Ham	PhD Brian Sullivan	Mr Tali Hatuka	PhD Student Gökhan Serhat	PhD Student Gert Willems	PhD Student Olga Charyeva	Prof Anca Daniela Ionita	Prof Valerie O'Donnell
Dr Andrea Rubano	Dr Carlos Hernandez Garcia	Dr Enrico Glaab	Dr Florence Geneste	Dr Rakesh Choubisa	Dr Ioannis Dalianis	Dr Marc Andrew Brightman	Ms Justyna Jonca	Mr Tianyang Nie	PhD Catarina Marvao	Dr Vera Leatitia Mulder	PhD Deirdre Clark	PhD Alexey Kamyshny	PhD Student Göktürk Kuru	PhD Student Hanne Wouters	PhD Student Olga Isupova	Prof Dorian Cojocaru
Dr Andrea Trentani	Dr CARMEN SIMAL FERNANDEZ	Dr Enrico Koenig	Dr Francois Caron	Dr Rakesh Joshi	Dr Ioannis Kopsinis	Dr Maria J. Rodriguez	Ms Klara Lucznik	Mr Tifei Yuan	PhD Claudia Almeida	Dr Welmoed Out	PhD Denis M. Provencher	PhD Anat Prior Unger	PhD Student Ibrahim Fatih Cengiz	PhD Student Lars Verdonck	PhD Student Sergey Luchkin	Prof Dorin Popescu
Dr Andrea Valori	Dr carolina Mallol	Dr Erik Gauger	Dr Francois Massol	Dr Rakesh Mukherjee	Dr Ioannis Tsamis	Dr Mark Bason	Ms Lucyna Wlodarczyk	Mr wenkun zhou	PhD Claudia Simao	Dr Wilhelmus Cornelius Verberk	PhD Devin Terhune	PhD Dana Gourevich	PhD Student Irmak Ertör	PhD Student luca marcolin	PhD Student Tagir Sadeev	Prof Georgeta Mihaela UNGUREANU
Dr Andrea Vinante	Dr Cecilia Gertrudis Paris Carrizo	Dr Esther Tippmann	Dr Frederic Delmas	Dr Ram Singh	Dr Ioannis Vakonakis	Dr Mark Platt	Ms Magdalena Switnicka	Mr Xiaoming Tu	PhD Fernanda Bajanca	Dr Willemijn Heeren	PhD Joshua Woodworth	PhD Dinorah Friedmann-Morvinski	PhD Student Kerem Kapucu	PhD Student Mathijs Vivet	PhD Student Vera Egorova	Prof Liviu Marsavina
Dr Angela Bellia	Dr Concepcion Badia Tortosa	Dr Eva Kowalinski	Dr Gabriel Lefèvre	Dr Ravi Shankar Sundaram	Dr Iordanis Kerenidis	Dr Mark Salik	Ms Zuzanna Urban	Mr Xin Wang	PhD Helena Sofia Domingues	Mr Cornelis Weemstra	PhD Katherine Hayden	PhD Ehud Cohen	PhD Student Kutlu Kutluer	PhD Student Nicole Dilissen	PhD Student Vladimir Groza	Prof Marian Aprodu
Dr Angela Romano	Dr Concepcion Gomez-Mena	Dr Eva Luther	Dr Gaëlle Le Bot	Dr Ravinder Dahiya	Dr John Lioumbas	Dr Marta Biedzka-Sarek	MSc Andrzej Jankowski	Mr YAXUAN YU	PhD Joana Costa	Mr Luuk van Hooren	PhD Lindsay Flynn	PhD Elena Shvets	PhD Student Mehmet Altug Yavuz	PhD Student Sam Van der Jeught	PhD Student Yury Berdnikov	Prof Mircea Giurgiu
Dr Aniello Napolitano	Dr Cristina Aliagas	Dr Eva Wiegmann-Schubert	Dr Gerald Enderlin	Dr Reshma Rani	Dr John Vardakas	Dr Martin Dallimer	MSc Anita Skulimowska	Mr Yilun Wang	PhD Joana Magalhaes	Mr Michiel Van Elk	PhD Matthew DiFranco	PhD Frida Ben-Ami	PhD Student Metin Aksu	PhD Student Valerie Bentivegna	Prof Andrey Stolyarov	Research Assistant Marlena Filimon
Dr Ankica Kosic	Dr Cristina Fernandez Fraguas	Dr Ewald Gunter Hermann August Quak	Dr Geraldine Coppin	Dr Richard Kumaran Kandasamy	Dr Kalliopi Dasyra	Dr Martin Dominik	MSc Anna Wojtyra	Mr Ying Chen	PhD joana santos	MSc Corine Baayen	PhD Melissa Graewert	PhD Hadas Amit	PhD Student Nazik Ogretmen	PhD Thomas Marichal	Prof Grigorii Sokolovskii	Research Associate Edi Tanase
Dr Anna Bonifazi	Dr Cristina Martin-Olmos	Dr Felix Grünewald	Dr Gregory Rogez	Dr Ritesh Ruhela	Dr Kalliopi Mylona	Dr Martin Greenall	MSc Bartłomiej Tomaszewski	Mr Yuning Ma	PhD João Filipe Oliveira	MSc Diederik Liebrand	PhD Nazli Rahim	PhD Haguy Wolfenson	PhD Student Onur Çetinkaya	PhD Tim Vanmierlo	Prof Lyudmila Zinchenko
Dr Anna Gallazzi	Dr Cristina Moreno Gutierrez	Dr Florian Scholz	Dr Guilhem Collier	Dr Roy Someshwar	Dr Konstantinos Giannakopoulos	Dr Martyn Key	MSc Bartosz Foltynski	Mr Zhenji Lu	PhD Katia Nunes	MSc Jan Jaap van Assen	PhD Pamela Rodriguez	PhD Hila Toledano	PhD Student Selin Ece	Prof Benoit Hackens	Prof Nadezhda Bulgakova
Dr Anna Maria Coclite	Dr Cristina Pulido	Dr Florian Toepfl	Dr Guillaume Dumazer	Dr Saikat Mukherjee	Dr Konstantinos Kotis	Dr Matt Dickson	MSc Dominika Bijos	Mr Zhenlin Yang	PhD Leonor Norton	MSc Karin van den Hurk	PhD Paul Marvar	PhD Karen Banai	PhD Student Serap Yapar	Prof Bernard Hallet	Prof Natalia Volgina
Dr Anna Maria Stagno	Dr Cristina Ramos Almeida	Dr Frank Hahn	Dr Guillaume Sescousse	Dr Sanjib Patra	Dr Konstantinos Kouroupis-Agalou	Dr Matthew Fraser	MSc Dorota Mrozek	Mr Zhibin Niu	PhD Letricia Pereira	MSc Leo Dvortsin	PhD Rachelle Adams	PhD Lilach Soreq	PhD Student Toros Ufuk Sanan	Prof Jan Eeckhout
Dr Antonella Di Trapani	Dr Cristobal Gonzalez Diaz	Dr Frank Wippich	Dr Gwenal Guillard	Dr Sankar Meenakshisundaram	Dr Konstantinos Tsilidis	Dr Matthew Hayward	MSc Elzbieta Regulska	Mr Zhigang Xue	PhD Ligia Tavares	MSc Mathijs de Jong	PhD Roderick Salisbury	PhD Maya Dank	PhD Student Ugur Karban	Prof Marie-Luce Chevalier
Dr Antonio Palermo	Dr Daniel Aguirre de Cárcer García	Dr Frauke Kersten	Dr Helene Bouju	Dr Sankaranarayanan Thangaraju Murugan	Dr Konstantinos Zekentes	Dr Matthew Orlinski	MSc Ewelina Doluk	Ms Amber Li	PhD Margarida Fernandes	MSc Ramses Sala	PhD Sarah Placella	PhD Oded Liran	PhD Tamer Onder	Prof Raf Vanderstraeten
Dr Arianna Piccialli	Dr Daniel Cantero Lauer	Dr Georg Basler	Dr Helene Duez	Dr Satyasiba Das	Dr Kyriaki Sidiropoulou	Dr Megan Wright	MSc Jacek Serafinski	Ms Joan Zhang	PhD Margarida Maia	MSc Raymond Rammeloo	PhD Sarah Whitcomb	PhD Ori Katz	Prof Abdurrahman Aydemir	Research Associate Joris Vangeneugden
Dr Arianna Traviglia	Dr Daniel Garcia Vivo	Dr Giovani Gomez Estrada	Dr Helene Javot	Dr Saurabh Pandey	Dr Magdalini Theodoridou	Dr Melanie Marshall	MSc Jeremi Wójcicki	Ms LAN SONG	PhD Maria Joo Fernandes Martins	MSc Rodinde Hendrickx	PhD Student Alexandria Colaco	PhD Orit Shefi	Prof Nesrin HASIRCI
Dr Armando Carlone	Dr Daniel Montesinos	Dr Harald Weilnboeck	Dr Heloise Cadet	Dr SHANTHANA LAKSHMI	Dr Manolis Mandalakis	Dr Michael Kelly	MSc Joanna Luczkowiak	Ms Li L. Liu	PhD Maria Margarida Souto-Carneiro	MSc Thiele Kobus	PhD Student Andrew Whitcomb	PhD Roi Gazit
Dr barbara furlotti	Dr Daniel Ortega Ponce	Dr Heiko Herrmann	Dr HELOISE LAVIGNE	Dr sharmistha paul	Dr Mantha Zarmakoupi	Dr Michael Plevin	MSc Kinga Westphal	Ms Ruifang Wang	PhD Maria Matos	MSc Tjerk Feenstra	PhD Student Anna Arstein-Kerslake	PhD Shahar Ayal
Dr Bertoli Simone	Dr Daniel Oves Costales	Dr Henning Tidow	Dr Igor Dorfmann-Lazarev	Dr Sheroy Minocherhomji	Dr Maria Farsari	Dr Michael Tayler	MSc Łukasz Breńkacz	Ms Xiu Gao	PhD Paula Duque	MSc Wessel van Leeuwen	PhD Student Carly Toepke	PhD Student amikam Bar-gil
Dr Bruno Gran	Dr Daniel Roca-Sanjuan	Dr Hubertus Rehbaum	Dr Isabelle Bachy	Dr Shibashish Mukherjee	Dr Maria Fyta	Dr Michaela Kendall	MSc Marcin Pszczola	Ms Yuxin Zhao	PhD Pedro Goncalves	PhD Anja Kombrink	PhD Student Christine Dzialo	PhD Student Amir Kaplan
Dr Butticci Annalisa	Dr Daniel Rodriguez	Dr Igor Barsukov	Dr Isabelle Brianso	Dr Shikha Sharma	Dr Maria Kandyla	Dr Mike Haydon	MSc Marek Rucinski	Ms Zhaojun Li	PhD Ramiro Almeida	PhD Anna Houben	PhD Student Christopher Hokamp	PhD Student Daria Kaptsan
Dr Camilla Colombo	Dr David Alcantara	Dr Ingmar Steiner	Dr Iza Marfisi	Dr Shyam Murti Gupta	Dr Maria Pichou	Dr Neil Howard	MSc Michal Chojnacki	Ms Zhen Guo	PhD Raquel Gomes	PhD Anne van der Does	PhD Student Daryl Domman	PhD Student Leonid Nichman
Dr Carla Portulano	Dr David Ciudad	Dr Isabel Toral-Niehoff	Dr Jacques Cuenca	Dr Siddharth Joshi	Dr Michael Terzidis	Dr Niels Warburton	MSc Michal Czapski	MSc Hong Sun	PhD Raquel Queirós	PhD Ciska Veen	PhD Student Heather Weber	PhD Student Svetlana Matskevich
Dr Carlo Antonini	Dr David Cnovas	Dr Jakob Blomer	Dr Jean Alexandre	Dr Sneha Bajpe	Dr Michail Loulakis	Dr Oliver Fenwick	MSc Michal Jablonski	MSc Jun Hu	PhD Ricardo Carreira	PhD Cornelis Boogerd	PhD Student Jiahao Huang	PhD Tal Burstyn-Cohen
Dr Carlo Camilloni	Dr David Ecija Fernandez	Dr Jan Schmoranzer	Dr Jean Provost	Dr Sonal Choudhary	Dr Michail Vlachos	Dr Olwen Grace	MSc Tomasz Bońkowski	MSc Mengchan Sun	PhD Ricardo Gonçalves	PhD Erik Aarden	PhD Student John McGraw	PhD Vered Padler-Karavani
Dr Carlo Lammirato	Dr David Fairen-Jimenez	Dr Jan Thiele	Dr Jean-Bernard Bouche	Dr Srabanti Ghosh	Dr Michalis Kontopodis	Dr Pau Carazo	MSc Tomasz Cieplak	MSc Teng Feng	PhD Ricardo Jose Ribeiro Soares	PhD Fina Kurreeman	PhD Student Karin Fisher	Prof Alexander Gelfgat
Dr Carlo Pozza	Dr David Gomez Miguez	Dr Janine Bosak	Dr Jean-Christophe Sarrazin	Dr Sreejith Shankar	Dr Niki Lambropoulos (Lampropoulou)	Dr Paul Johnson	PhD Agnieszka Klar	MSc Xueji Zhang	PhD Sara da Costa	PhD Floris Van Vugt	PhD Student Matthew Vincent	Prof Eli Ben-Sasson
Dr Carlotta Giannelli	Dr David Mera	Dr Jens Fielitz	Dr Jean-Francois Mouhot	Dr SREENIVASA REDDY PUNIREDD	Dr Nikolaos Bakas	Dr Peter Buzzacott	PhD Anna Kaczmarska	MSc Zhenyu Xiao	PhD Sara Vieira-Silva	PhD Frances de Man	PhD Student Melanie R. Wattenbarger	Prof Gal Chechik
Dr Carmelo Fruciano	Dr David Muñoz-Rojas	Dr Jens Hausmann	Dr Jean-Luc Demonsant	Dr Sridhara Chary Nallanthigal	Dr Nikolaos Kalfagiannis	Dr Philip Vardon	PhD Anna Ujwary-Gil	MSc ZhongZhe DONG	PhD Sofia Augusto	PhD Hiske van Duinen	PhD Student Quintin Tyrell Davis	Prof Shie Mannor
Dr Caterina Minelli	Dr David Santamaria-Perez	Dr Joerg Leers	Dr Jean-Marc Montanier	Dr SRIKANTH SANDIPAM	Dr Nikolas Nikitas	Dr Pippa Moore	PhD Bartosz Rozycki	PhD He Hu	PhD Sonia Cruz	PhD Jacco de Zwart	PhD Student Reid Oldenburg
Dr Caterina Zanella	Dr Diana Serrano	Dr Johanna Silber	Dr Jean-Paul Boy	Dr Srinivasa Rao Popuri	Dr Olga Panagiotopoulou	Dr Rebecca Wragg Sykes	PhD Dalia Anna Pokutta	PhD HONGLING HUANG	PhD Student Adolfo Martins	PhD Jojanneke van der Toorn	PhD Student Robert Banks
Dr Cesare Cuttica	Dr Didac Busquets	Dr Johannes Albrecht	Dr Jean-Philippe Brantut	Dr Sudeep Roy	Dr Panagiotis Keivanidis	Dr Rob Boddice	PhD Ela Drazkiewicz	PhD Jie Liu	PhD Student Adriana Gomes	PhD Joost van de Weijer	PhD Student Seth Newton
Dr Chiara Bernardini	Dr Diego Fernandez Sevilla	Dr Johannes Schwobel	Dr Jean-Philippe Gras	Dr Sudip Malik	Dr Pantelis Angelidis	Dr Robert Carlyle Pullar	PhD Ewa Strzelec	PhD Jin Bao	PhD Student Ana Bolhaqueiro	PhD Machteld Hoeve	PhD Student Stephanie Munroe
Dr chiara bortolotto	Dr Diego Gomez-Nicola	Dr Jonas Peters	Dr Jennifer Zeitlin	Dr Sumit Deswal	Dr Paraskevi Salamaliki	Dr Robert Davies	PhD Joanna Gruszczynska-Biegala	PhD Student Bing Wu	PhD Student Ana Margarida Costa	PhD Nils Borgesius	PhD Student Steven Meyers
Dr Chiara Mingarelli	Dr Eduard Matito	Dr Julia Boll	Dr Jerome Bouvier	Dr Sunil Patil	Dr Pavlos Rigas	Dr Robert Kenneth Neely	PhD Juan Carlos Colmenares Quintero	PhD Student Binghuan Lin	PhD Student Ana Pinto	PhD Robert van der Burgh	PhD Zoey Herm
Dr Christian Trefzger	Dr Eduardo Ruiz Hernandez	Dr Julia Kleinteich	Dr Juan Rivera	Dr Suparna Mitra	Dr Peristera Andreakou	Dr Robert Mahen	PhD Kamila Magdalena Wolanin	PhD Student Changrong Ge	PhD Student ana sofia cardoso martins	PhD SHIH-CHIN CHENG	Prof Christine Helmer
Dr Claudia Cenedese	Dr Elena Caro	Dr Julian Holstein	Dr Julie Gavard	Dr Supratik Roychowdhury	Dr Petros Samartzis	Dr Rosalind Gillis	PhD Katarzyna Zielinska	PhD Student Chuixiu Huang	PhD Student Ana Sofia Fonseca	PhD Student Cornelis Blauwendraat	Prof David Shaffer
Dr Claudia Innocenti	Dr Elisa Antolin	Dr Jürgen Schiefele	Dr Julie Klein	Dr Suresh Kattimuttathu Ittara	Dr Sofia Papadimitriou	Dr Sabrina Gordon-Keylock	PhD Kinga Kamieniarz-Gdula	PhD Student Chunming Zhao	PhD Student Ana Sofia Ribeiro Santos	PhD Student Eric van der Helm	Prof Jon Harbor
Dr Claudia Minniti	Dr Enrique Garcia-Bordeje	Dr Karola Böhme	Dr Julien Cucherousset	Dr Suresh Reddy Chidipudi	Dr Spyridon Kitsionas	Dr Sandy Cochran	PhD Krzysztof Slusarczyk	PhD Student Duan Li	PhD Student Ana Suarez	PhD Student Guido Zeegers	Prof Judith Barringer
Dr Claudia Monaco	Dr Enrique Palencia Cortezon	Dr Katharina Rolfs	Dr Julien Martin	Dr Tanuj Sapra	Dr Stamatia Rizou	Dr Sarah McLaughlin	PhD Maciej Mateusz Telesinski	PhD Student Fangyan Yu	PhD Student ana trindade	PhD Student Harmen Gudde	Prof Mark Pagell
Dr Claudia Racca	Dr ERKUDEN PEREZ-CARRERA	Dr Katja Hanke	Dr Julien Michel	Dr Thangasivam GANDHI	Dr Stavros Degiannakis	Dr Sarah Woodin	PhD Magdalena Chadzinska	PhD Student Fanlin Meng	PhD Student André Dias	PhD Student Jantine Broek	Prof Nancy Stenson
Dr Claudio Alfieri	Dr Esteban Ferrer	Dr Klaus Rischka	Dr Julien Mouysset	Dr Thanneer Malai Perumal	Dr Stavroula Kyriazi	Dr Scott Mitchell	PhD Magdalena Kulijewicz-Nawrot	PhD Student fuchao xu	PhD Student Andreia Albuquerque	PhD Student Johannes Postema	Prof Rory De Paolis
Dr Claudio Bellei	Dr Esteve Corbera	Dr Konstantin Kuteykin-Teplyakov	Dr Karine VAUCHEZ	Dr Tuhin Shuvra Basu	Dr Stella Sylaiou	Dr Scott Telfer	PhD Malgorzata Mikucka	PhD Student Jiaguo Huang	PhD Student Andreia Ribeiro	PhD Student Joyce van Tunen	Prof Tamar Barkay
Dr Claudio Di Felice	Dr esther alarcon llado	Dr Kristina Jonas	Dr Laetitia Davidovic	Dr Umar Jan Rashid	Dr Stephanos Nitodas	Dr Simon Dawson	PhD Malgorzata Tokarska-Schlattner	PhD Student Jiayuan Zhao	PhD Student António Santos	PhD Student Jurjen Couperus	Prof VERONICA BENET-MARTINEZ
Dr Claudio Fontana	Dr Estibaliz Larrainzar	Dr Kristina Schachtrup	Dr Laurent Puymerail	Dr VAIBHAV PHADNIS	Dr Tamer Panagiotis Doss	Dr Simon Dowland	PhD Marcin Smietana	PhD Student JIE GENG	PhD Student Bárbara Oliveira	PhD Student Kartik Kumar
Dr Cosimo Fedeli	Dr Eva Amaranda García Rodríguez	Dr Lars Götzenberger	Dr Laurent Rene Henri Ponson	Dr Vasanthakumar Ganga Ramu	Dr Tanya Vavouri	Dr Sophie Schirmer	PhD Mariusz Uchman	PhD Student Lei XIONG	PhD Student Catarina Remédios	PhD Student Laura Snip
Dr Cristiana Ciannito	Dr Eva Villaver	Dr Lars Wieneke	Dr Laurent WARLOUZET	Dr Vasudheva Reddy Akepati	Dr Theodora Alexopoulou	Dr Stephen Robert Clark	PhD Marta Kisiel	PhD Student Maonian Xu	PhD Student Catarina Rua	PhD Student Maik Sliepen
Dr Cristiano Alessandro	Dr F. Javier Moreno	Dr Lena Oesterlin	Dr Laurie Sikorski	Dr Vijay Arumugham	Dr Theodore Markopoulos	Dr Thomas Gorochowski	PhD Marta Magdalena Mroz	PhD Student Mengyun (Maureen) Xu	PhD Student Cátia Frias	PhD Student Manon Kok
Dr Daniele Guardavaccaro	Dr Fabio Revuelta	Dr Maksym Tsytlonok	Dr Leila Perie	Dr Vijay Kanawade	Dr Theodoros Bitsakis	Dr Tim Fawcett	PhD Marta Markiewicz	PhD Student Ning Chen	PhD Student Cristina Rocha	PhD Student Marco Mout
Dr Daniele Perna	Dr Federico Valverde	Dr Manfred Ruehrig	Dr LInda Boutoille	Dr Vinod Kumar	Dr Theodoros Tsoufis	Dr Timothy Peace	PhD Matylda N Guzik	PhD Student Sisi Cai	PhD Student Daniela Lobo	PhD Student Marlies van der schee
Dr Daniele Rotolo	Dr Felix Casanova	Dr Marc-Oliver Mewes	Dr Lionel Apetoh	Dr Vishwas Lakkundi	Dr Theodossis Theodossiou	Dr Tracey Ann Cuin	PhD Przemyslaw Bidzinski	PhD Student Weiwei Xiang	PhD Student Daniela Moutinho	PhD Student Silvia Ekkerman
Dr Daniele Scopece	Dr Felix Martinez	Dr Marcel Lauterbach	Dr Loic Grevillot	Dr Vivek Nityananda	Dr Thomas Goudoulas	Dr Victoria Martin	PhD Przemyslaw Lenkiewicz	PhD Student Wenjing Qian	PhD Student Danilo A. Jesus	PhD Student Stephan van Duren
Dr Daniele Vigolo	Dr Fernando Alonso-Fernandez	Dr Marcel Schweiker	Dr Loic Jullion	Dr Vyas Akondi	Dr Thomas Sotiriou	Dr Vitaliy Kurlin	PhD Rafal Kapela	PhD Student Wenting Dang	PhD Student Eunice Sofia Da Silva	PhD Student Tim Wezeman
Dr Danilo Maddalo	Dr Fernando Gomez	Dr Marco Schmidt	Dr Lorena Perrone	Mr Abhijeet Kumar	Dr Thomas Stergiopoulos	Dr William Green	PhD Sebastian Koziolek	PhD Student Xiangcheng Chen	PhD Student Flávia Viana	PhD wouter van den Bos
Dr Danilo Raponi	Dr Fernando Josa Prado	Dr Marianne Matzke	Dr Luc Dessart	Mr Abhishek Bhargava	Dr Vaggelis Giannikas	Dr William Reece	PhD Sebastian Kula	PhD Student Xiaochen Yang	PhD Student Gilmar Pereira	PhD Yvonne Vercoulen
Dr Dario Fornara	Dr Fernando Monje-Casas	Dr Mark Alexander Lever	Dr Lucie Salvaudon	Mr Amar Bogadhi	Dr Valantis Fyndanis	Dr Zoe Schnepp	PhD Seweryn Morawiec	PhD Student XINWEI FANG	PhD Student Henrique Machado	Prof Emanuel Habets
Dr Davide Franco Zoccolan	Dr Fernando Prez-Caballero	Dr Markus Butz	Dr Magalie Martineau	Mr Amarnath Hegde	Dr Vasia Lekka	Mr Austin Nevin	PhD Stanisław H. Nowak	PhD Student Yang Wang	PhD Student Hernani Costa	Prof Frank Koppens
Dr Davide Gabellini	Dr Ferran Macia Bros	Dr Markus Kuhn	Dr manon Guille	Mr Amit Kumar	Dr Vasileios Vavourakis	Mr Christian Broadway	PhD Student Agnieszka Gajewska	PhD Student Yin Wang	PhD Student Ines Cardoso	Prof Ger Strous
Dr Davide Giust	Dr Francesc Xavier Marsellach-Castellvi	Dr Markus Rex	Dr Marc Berdet	Mr Amit Zodge	Dr Vasilis Niarchos	Mr Jonathan Ollar	PhD Student Agnieszka Popielec	PhD Student Yiqiang Zhan	PhD Student Ivo Leite	Prof Marcel Zeelenberg
Dr Davide Mattia	Dr Francisco Barranco	Dr Markus Teige	Dr Marie Levant	Mr Anirban Bhattachariya	Dr Vasilis Sourlas	Mr Paul Booker	PhD Student Aleksandra Korzystka	PhD Student Yixuan CAO	PhD Student Joao Banha Oliveira	Prof Richard Hoogenboom
Dr Davide Proverbio	Dr Francisco Javier Arias	Dr Markus Verne	Dr Marie-Berengere Troadec	Mr Arif Husain Ansari	Dr Vasilis Valdramidis	Mr Paul Haigh	PhD Student Aleksandra Mazur	PhD Student Yu Qian	PhD Student Lara Paulo	Prof Wandi Bruine de Bruin
Dr Davide Schiavone	Dr FRANCISCO JAVIER MARTÍNEZ-ANTONIO	Dr Martin Bernhard Ulmschneider	Dr Marie-Caroline Miot	Mr Arjun Chennu	Dr Vassiliki Lila Koumandou	Mr Peter Cherry	PhD Student Alicja Kubiak	PhD Student Yu Zhang	PhD Student Leonor Santos	Prof Willem Brouw
Dr Devis Tonon	Dr Francisco Rodriguez-Sanchez	Dr Martin Denzel	Dr Marie-Cecile Caillaud	Mr Ashutosh Dhingra	Dr Vassilios Dallas	Mr Robin Eccleston	PhD Student Alina Brzeczek	PhD Student Yuanlong LIU	PhD Student Marco Castro	Prof Willem van Westrenen
Dr Diego Calaon	Dr Francisco Vega	Dr Martin Rücklin	Dr Marilena Vecco Vallois	Mr Ashwinikumar Sharma	Dr Vassilis Kekatos	Ms Amy Featherstone	PhD Student Anna Hynowska	PhD Student Yun Jiang	PhD Student Margarida D. Carvalho
Dr Diego Cotella	Dr Gemma Giménez Papiol	Dr Martin Salinga	Dr Marina Kvaskoff	Mr Balachandra Reddy Kandukuri	Dr Vassilis Koutkias	Ms Laura Hobbs	PhD Student Anna Wolczyk	PhD Student Yunfeng Nie	PhD Student Maria Paula Pereira Bastião
Dr Diego Reforgiato Recupero	Dr Georgina RIVERA	Dr Martina Beyrau	Dr Marina Launay	Mr Bhaskarjyoti Sarma	Dr Virginie Papadopoulou	Ms Nusrat Latif	PhD Student Anna Wrega	PhD Student YUTING LIU	PhD Student Mariana Coelho da Mota
Dr Donatella Zona	Dr Gisela Orozco	Dr Matthias George	Dr Marion Jasnin	Mr Daya Pandey	Dr Yorgos Stratoudakis	Ms Sarah Davenport	PhD Student Barbara Zietek	PhD Wanhui You	PhD Student Marta Cerejo
Dr Elena Martines	Dr Gonçal Badenes	Dr Matthias Rupp	Dr Marjorie Louise Marie Fournier	Mr Devdutt Kulkarni	Dr Zoe Cournia	MSc Alice Marzocchi	PhD Student Celina Wierzbicka	PhD Xiaomeng WANG	PhD Student Marta Cova
Dr Elena Masciadri	Dr Gonzalo Abellán	Dr Max Steinhardt	Dr Martha Liliana SUAREZ PENALOZA	Mr Dhruv Mehta	Mr Anastasios Toulitsis	MSc Charles Breeze	PhD Student Daria Kaczmarek	PhD Xiaosong Ma	PhD Student Marta Jordão
Dr Eleonora Passeri	Dr Gorka Zamora-López	Dr Meik Neufurth	Dr Martin Lenz	Mr Gaurav Pathak	Mr Antonios Georgantzoglou	MSc Fiona Elam	PhD Student Dorota Natalia Komar	PhD Xiyu Ouyang	PhD Student Monica Correia dos Reis
Dr Elisa Salvetti	Dr Guillermo Gallego	Dr Melanie Karin Philipp	Dr Mathias Blanc	Mr Gopal Shankar KrishnaKumar	Mr Christos Mitrogiannis	PhD Alex Upton	PhD Student Dorota Truszkowska	PhD Yingdi Yan	PhD Student Paulo Saldanha
Dr Elisabetta Volpe	Dr Irene Eleta	Dr Michael Duehrssen	Dr Mathieu Duval	Mr Hari Krishna Bisoyi	Mr Christos Stiapis	PhD Alexander W. Bruce	PhD Student Elzbieta Pach	PhD Yu-Xuan Lu	PhD Student Pedro Figueiredo e Silva
Dr Eloisa Bentivegna	Dr Irene Lucas del Pozo	Dr Michael Lienemann	Dr Mathieu Frechin	Mr HARIPRASAD THANGAVEL	Mr Dionysios Efstathiou	PhD Catherine Preston	PhD Student Emilia Pawlusz	PhD yuan tian	PhD Student Ricardo Correia
Dr Emanuela Campisi	Dr Irene Romero	Dr Michael Schmuker	Dr Mathilde Janot	Mr Himanshu Himanshu	Mr Eleftherios Zografos	PhD Christopher Thomas	PhD Student Izabela Matyszczak	PhD Zongzhao Zhai	PhD Student Rita Ribeiro
Dr Emanuele Pasqualotto	Dr Iria Fernandez Silva	Dr Michael Schweikert	Dr Matteo Palma	Mr Imran Siddiqui	Mr Fotis Gonidis	PhD Edward Wallace	PhD Student Joanna Kolomanska	Prof Chongsheng Zhang	PhD Student Vanda Dias
Dr Emiliana Giacomello	Dr Isabel Nogues	Dr Michael Wand	Dr Matthew Nguyen	Mr Jai Prakash	Mr Georgios Mavroeidakos	PhD Gnanach Gnanakumaran	PhD Student Joanna Kucharska	Prof Faming Wang	PhD Student Vanessa Gonçalves
Dr Emmanuele Cappelluti	Dr Ismael Galvan Macias	Dr Michael Weber	Dr Matthew Nguyen	Mr Jayachandra Naidu Sakamuri	Mr Georgios Nianios	PhD Linda Howard	PhD Student joanna zmurko	Prof Jiacheng Wang	PhD Susana Montenegro Gouveia
Dr Enrica Gianotti	Dr Jaime Carvajal	Dr Michaela Hundertmark	Dr Matthieu Vangeleyn	Mr JAYASIMHA BAGALKOTE	Mr Georgios Papageorgiou	PhD Niwa Ali	PhD Student Justyna Ogonek	Prof maosen cao	PhD Tania Quintas Martins
Dr Enrico Magnani	Dr Jaime Guillén	Dr Mierk Schwabe	Dr Maxime Lebugle	Mr Jivesh Kaushal	Mr Georgios Skoumas	PhD Philip Jackson	PhD Student Karol Bartosiewicz	Prof Meng Xu	PhD Vania Almeida
Dr Enzo De Sena	Dr Javier Lopez Albacete	Dr Mira Jakovcevski	Dr Mazen Abi Hussein	Mr KONATHAM SAIKRISHNA REDDY	Mr Ioannis Georgiou	PhD Sarah Robinson	PhD Student Katarzyna Seget	Prof shenqi Wang	PhD Vitor Vieira
Dr Erica Elisa Ferrandi	Dr Javier Lopez Pena	Dr Mirko Kunowsky	Dr Miloud Bouyahyi	Mr Magesh Sadasivam	Mr Konstantinos Lentas	PhD sharad kholia	PhD Student Klaudyna Dziedzic	Prof Songjun Li	Research Associate Domingos Barbosa
Dr Eva Servoli	Dr Javier Rodriguez Perez	Dr Monika Class	Dr Morgane Barbet-Massin	Mr Mahadeo Halhalli	Mr Mano Masourakis	PhD Student Alexander Owen-Hill	PhD Student Lukasz Kuryk	Prof Victor Wang	Research Associate Lina Cavaco
Dr Fabio Franchini	Dr Javier Terriente Felix	Dr Natalie Fecher	Dr Nadia Kaouane	Mr Manoj Rajashekara	Mr NIKOLAOS CHRISTOGIANNIS	PhD Student Amy Goddard	PhD Student Magdalena Kierkowicz	Prof xiaoyong wei	Research Associate Rossana Henriques
Dr Fabrizio Rossi	Dr Jesus Maria Carro Prieto	Dr Nicole Walczyk	Dr Nathalie Britzen-Laurent	Mr Mohan Babu KUPPAM	Mr Nikolaos Dalivigkas	PhD Student Amy Whitbread	PhD Student Magdalena Kruza	Research Associate Gen Li
Dr Federica Pacifico	Dr Joan Ballester	Dr Nikolaus Benedikt Baron Von Engelhardt	Dr Nicolas Farrugia	Mr Nagarajan Palavesam	Mr Odisseas Panopoulos	PhD Student Benjamin Egan	PhD Student Magdalena Lis
Dr Federico Caria	Dr Joan Boren	Dr Nils Goseberg	Dr Nicolas Godbert	Mr Nagendra Babu Srinivasan	Mr Panagiotis Farantatos	PhD Student Emma Kuwertz	PhD Student Magdalena Wawrzyniuk
Dr Filippo Ciceri	Dr Joaquin Capablo	Dr Nils Ohnesorge	Dr Nicolas LE BIHAN	Mr Nitin Jindal	Mr Spyridon Papadopoulos	PhD Student Grace Oppong	PhD Student Malwina Michalak
Dr Filippo Mangolini	Dr Jofre Tenorio Laranga	Dr Nina Schneider	Dr Nicolas Lescureux	Mr Paras Mehta	Mr Vasiliki Panagiotopoulou	PhD Student Jess Halliday	PhD Student Marcin Bartosik
Dr Filippo Sladojevich	Dr Jon Urrestilla	Dr Nino Ferrin	Dr Nicolas Poirier	Mr Pranjal Kumar Baruah	Mr Yiannis Chatzizisis	PhD Student Katie Hogg	PhD Student Martyna Stelmaszczuk-Górska
Dr Francesca Accettola	Dr Jordi Mur-Petit	Dr Oliver Büttner	Dr Nicolas Troquard	Mr Prasanta Sarkar	Mr Yiannis MAGLARAS	PhD Student Rosie Richards	PhD Student Mateusz Gugala
Dr Francesca Carboni	Dr Jordina Sales-Carbonell	Dr Oliver Nicolas Ross	Dr Olivier Gimenez	Mr Prasoon Prabhakaran	Ms Aikaterini Tsilingiri	PhD Student Sara Cameron	PhD Student Mateusz Zelkowski
Dr Francesca Faedi	Dr Jorge Barriuso	Dr Patrick Becker	Dr Olivier Lepais	Mr Pritam Sukul	Ms Angeliki Tsichla	PhD Student Tom Day Goodacre	PhD Student Matt Jaskulski
Dr Francesca Maria Toma	Dr Jorge Bernardino de la Serna	Dr Peter Gross	Dr Olivier THEBAUD	Mr rahul agarwal	Ms Elena Kranioti	Prof Adrian Heathfield	PhD Student Michał Świtnicki
Dr FRANCESCA RONCARATI	Dr Jorge Esparza Gordillo	Dr Peter Klüpfel	Dr Ophelia Deroy	Mr Rahul Arora	Ms MEROPI SKLEPARI	Prof Alistair Jump	PhD Student Nina Chrobot
Dr Francesco Belardinelli	Dr Josabel Belliure	Dr Philipp Mergenthaler	Dr Pauline Burger	Mr Rajesh Kumar	Ms Olga-Christina Mavrouli	Prof Andrea Noble	PhD Student Pawel Kozielewicz
Dr Francesco Catania	Dr José A Ruiz-Arias	Dr Philipp Rathert	Dr Phil Monbet	Mr Ramveer Choudhary	MSc Alexandra Vatsiou	Prof David Schmool	PhD Student Pawel Mikulski
Dr Francesco Citiulo	Dr Jose Carlos Diaz Ramos	Dr Philipp Ternes	Dr Pierre Khoueiry	Mr Ranabir Roy	MSc Alexandra Vatsiou	Prof John Hunt	PhD Student Piotr Gajewski
Dr Francesco Gagliardi	Dr Jose Carlos Noguera	Dr Rainer Timm	Dr Pierre Millard	Mr Ravi Adusumalli	MSc Alexandros Rapidis	Prof Laurence Blackshaw	PhD Student Piotr Krzywkowski
Dr Francesco Grassi	Dr José Carlos Sánchez-Pardo	Dr Ralf Hannemann-Tamas	Dr Pierre Offre	Mr Renji Reghu	MSc Athanasios Pantelopoulos	Prof Marion Hetherington	PhD Student Piotr Zdankowski
Dr Francesco Martorella	Dr Jose Luis Riechmann	Dr Raphael Zahn	Dr Priscilla Bayle	Mr Rudraksh Shrivastava	MSc Barbara Konstantina Kondilis	Prof Paul Winyard	PhD Student Radosław Borowski
Dr Francesco Niola	Dr Jose M. Alsina	Dr Rene Fassbender	Dr Raphael Rubino	Mr Sai Suman Cherukuwada	MSc CHRYSSOULA STAMATOGIANNI	Prof Paula Jarzabkowski	PhD Student Tomasz Cudejko
Dr Francesco Ometto	Dr Jose Manuel Martinez-Rivas	Dr René Höfer	Dr Rgis Delatouche	Mr Sam Stephen	MSc Dimitrios Chronopoulos	Prof Thomas Thomson	PhD Student Witold Januszewski
Dr Francesco Papaleo	Dr Jose Miguel Arbones-Mainar	Dr Ricarda Nater-Mewes	Dr Rizvi Rahman	Mr Shreyas Mysore Suryanarayana	MSc Dimitris Grivas	Prof Tonia Novitz	PhD Student Zuzanna Wawrzyniak
Dr Francesco Pesce	Dr Jose San Pedro Wandelmer	Dr Roland Schwarz	Dr Romain Barnard	Mr SHUBHAM PANDEY	MSc GEORGIOS KOUMANAKOS		PhD Szymon Stoma
Dr Francesco Ricciardi	Dr Jose Sanchez Costa	Dr Romy Matthies	Dr romain goutagny	Mr Sourav Marik	MSc Georgios Leontidis		PhD Tomasz Zernicki
Dr Francesco Santini	Dr Josefa Gonzalez	Dr Ronny Nawrodt	Dr Romain Koszul	Mr Srikanth Sridharan	MSc Georgios Zoulinakis		Prof Adam Morawiec
Dr Francesco Trotta	Dr Josep Puigmarti-Luis	Dr Sabine Dörry	Dr Romain Parent	Mr Srikrishna Nudurumati	MSc Katerina Kademoglou		Prof Andrzej Jardzioch
Dr Gabriela Elena Torres	Dr Josep Villanueva	Dr Sabine Gerbersdorf	Dr Romain Rumpler	Mr Sudharsana Raamanujan Raman	MSc Stefanos Samaras		Prof Bartlomiej Szafran
Dr Gabriele Boccolini	Dr Juan Alba Cano	Dr Sabine Weisheit	Dr Rudy Pastel	Mr Sujit Kootala	MSc THOMAS SATZOUKIDIS		Prof Jakub Zakrzewski
Dr Gabriele Meloni	Dr Juan Blanco	Dr Sabrina Disch	Dr Sabine Suire	Mr Sushil Kumar	PhD Alexandros Kleidaras		Prof Piotr Oprocha
Dr Gabriele Ponti	Dr Juan Carlos Martinez	Dr Sandra Rebok	Dr Sami Kereiche	Mr Sushil Shakyawar	PhD Anastasia Poupkou		Research Assistant Agnieszka Karas
Dr Gabriele Raino	Dr Juan Diego Sánchez Heredia	Dr Sebastian Brck	Dr Samuel Boissier	Mr Sushovan Dam	PhD Apostolos Georgiadis		Research Assistant Joanna Elwira Sychta
Dr Gesmi Milcovich	Dr Juan J. Hidalgo	Dr Sebastian Clauss	Dr Sandra GIRON	Mr Tanmoy Samaddar	PhD Aspasia Destouni
Dr Giacomo Parrinello	Dr Juan Pedro Fernández-Blázquez	Dr Sebastian Schwarz	Dr Sarah Berhanu	Mr VANIYA DARSHAK	PhD Eleni Papadopoulou
Dr Gian Mario Cao	Dr Juan Pedro Ferrio Daz	Dr Siegfried Korhammer	Dr Sebastien Poulain	Mr Vignesh Jayarajan	PhD Elizabeth Key Fowden
Dr Gianluca Giorgolo	Dr Juan Roa Rivas	Dr Silke Werth	Dr Simon Tricard	Mr Vikram Naik	PhD GEORGIA FOUSTERI
Dr Gianluca Lamanna	Dr Juan Rodriguez Vita	Dr Simon Trowitzsch	Dr Solange Rigaud	Mr Vinod Kumar	PhD Katerina Aravantinou Fatorou
Dr Gianluca Rastelli	Dr Juan Rojo	Dr Simone Linz	Dr Souliman El Moussaoui	Mr Vivek Kumar	PhD Konstantinos Chorianopoulos
Dr Giorgio Cinacchi	Dr Juan Trapero	Dr Sophie Lecheler	Dr Stephane Charlot	Ms Aswathy Surendran	PhD Marianthi Karali
Dr Giorgio Favrin	Dr Juanma Vaquerizas	Dr Stefan Gold	Dr Stéphane Fay	Ms Bhairavi Swaminathan	PhD Michail Giannakos
Dr Giorgio Ferri	Dr Julia Maldonado-Valderrama	Dr Stefan Haessler	Dr Stephane Marinesco	Ms Nivedita Shroti	PhD Student Afroditi Koutoulaki
Dr Giorgio Zoppellaro	Dr Kepa Koldo Burusco-Goñi	Dr Stefan Mengel	Dr Stephane Poss	Ms Priyasmita Sinha	PhD Student Agni Faviola Mika Gavriilidou
Dr giovanni bussotti	Dr Laia Civit Pitarch	Dr Stefan Rüdiger	Dr Sylvain Barbay	Ms Richa Gupta	PhD Student Alexandros Pennos
Dr Giovanni Covone	Dr Laia Colomer Solsona	Dr Stefan Walter	Dr Sylvain Jean Aubry	Ms Suparna Karmakar	PhD Student Alkyoni Baglatzi
Dr Giovanni Motta	Dr Lara Lobo Revilla	Dr Stefanie Thiem	Dr Sylvain Keav	MSc Anil Butchi Reddy	PhD Student Angelos Giannakopoulos
Dr Giovanni Tonon	Dr Laura Alonso	Dr Steffen Zschaler	Dr Sylvain Loubéry	MSc Ashwin Narayanan	PhD Student Angelos Karatsidis
Dr Giuliana Deflorio	Dr Laura Barrio Pliego	Dr Stephanie Heinrich	Dr Sylvain Martin	MSc Deepak Garg	PhD Student ANTONIA KOSTAKOU
Dr Giuseppe De Martino	Dr Laura Martnez Suz	Dr Susanne Franziska Fenz	Dr Tanguy Le Borgne	MSc Deepesh Kumar Singh	PhD Student Aram Santogidis
Dr GIUSEPPINA MUTRI	Dr Laura Moreno	Dr Susanne Schmidt	Dr Thanh-Truc Vu	MSc Kalyanasundaram Subramanian	PhD Student Artemis Kouvaka
Dr Grazia A. Di Pietro	Dr Laura Tolos	Dr Sven Friedemann	Dr Thibault Derrien	MSc KISHLAY KUMAR	PhD Student Athanasios Litsios
Dr Greta Faccio	Dr Lidia Lopez-Serra	Dr Sven Rühle	Dr Thibaut Decressin	MSc Megha Girdhar	PhD Student Athina Argyrouli
Dr Guido Schillaci	Dr Lidia Nieto Garrido	Dr Sven Wedemeyer	Dr Thomas Henry	MSc Niketa Mukherjee	PhD Student Charalampos Kalalas
Dr Guido Tintori	Dr Lucas Lamata	Dr Sylvia Walter	Dr Valerie Nicaise	MSc Rajesh Rathore	PhD Student Christoforos Vlachos
Dr Helen Dawson	Dr Luis Carlos Lopez Garcia	Dr Thomas Blank	Dr VALERIE VERDIER	MSc Raju Shivarathri	PhD Student Christos Tsiafis
Dr Ignacio Gallo	Dr LUIS FERNANDO SANCHEZ-BARBA MERLO	Dr Thomas Gensch	Dr Vallet Bertrand	MSc RAMACHANDRAN BOOPATHI	PhD Student CHRISTOS VEZYRIS
Dr Ignazio Pillitteri	Dr Luis Mancera Pascual	Dr Thomas Hansen	Dr Vincent Puard	MSc Sangeetha Balabhadra	PhD Student Despoina Antonakaki
Dr ILARIA ANNA COLUSSI	Dr Luis Matias Resina	Dr Thomas Kiefer	Dr Violaine Llaurens	MSc SHARMIN NADKARNI	PhD Student Dimitrios Christaras
Dr Irene Cantone	Dr Luis Merino-Martín	Dr Thomas Wolbers	Dr Violaine Pinon	MSc Shikhar Aggarwal	PhD Student DIMITRIOS SKEMPES
Dr Irene Coin	Dr LUIS SANZ ANDREU	Dr Till Moritz Karbach	Dr Virginie Van Wassenhove	MSc Soni Deshwal	PhD Student EFSTATHIOS MARGARITIS
Dr Irini Papanicolopulu	Dr Luis Valledor	Dr Till Strowig	Dr Xabier Itçaina	MSc Sujitha Puthukodan	PhD Student Efstathios Reppas- Chrysovitsinos
Dr Italo Balestra	Dr Maciel Zortea	Dr Tim Albrecht	Dr Xavier Besseron	MSc SURENDRA KUMAR YADAV	PhD Student Efstratios Fonias
Dr Ivan Serina	Dr Maite Louzao Arsuaga	Dr Timm Schlegelmilch	Dr Xavier De Hatten	MSc Suresh Kumar Jetti	PhD Student EIRINI LIOTOU
Dr Jacopo Di Russo	Dr Marc Casas Guix	Dr Timo Betz	Dr Xavier Hinaut	MSc Tushar Suhasaria	PhD Student Eirini Maria Paschalidou
Dr Lapo Bogani	Dr Marc Torrent Burgas	Dr Tino Dornbusch	Dr xavier morin	MSc Vignesh Thammanna Gurumurthy	PhD Student Elli Papadimitriou
Dr Laura Carnelos	Dr Marc Vendrell Escobar	Dr Tobias Beck	Dr Xavier Nicol	PhD Ankur Mutreja	PhD Student Ellie Stathopoulou
Dr Laura Ragni	Dr Marcos Engelken-Jorge	Dr Tobias Freitag	Dr Yannick Sonnefraud	PhD Eaazhisai Kandiah	PhD Student Evangelia Kotsiliti
Dr Laura Riva	Dr Marcos Llope	Dr Udo Christian Kaunert	Dr Yvon Jaillais	PhD Gayatri Das	PhD Student Evanthia Giagloglou
Dr Laura Saija	Dr Margarita Rivera Sanchez	Dr Ulrich Blum	Mr Alexis Rozenknop	PhD MARIMUTHU PALANISAMY	PhD Student Georgia Stavropoulou
Dr Leonardo Tozzi	Dr Maria Castro	Dr Ulrike Jgle	Mr Arnaud Lanoue	PhD Mohammed Mahidur Rahman	PhD Student Georgia Tseliou
Dr Liliana Liverani	Dr María Cruz Berrocal	Dr Ulrike Jordan	Mr Arthur Etienne Leblois	PhD Neelam Bhardwaj	PhD Student GEORGIOS LIAPPAS
Dr Lorenzo Calvelli	Dr Maria Del Carmen Casado	Dr Veronique Huth	Mr Bhouri Mehdi	PhD Nithyakalyani Sri Rangan	PhD Student Georgios Miliotis
Dr Lorenzo Fagiano	Dr Maria Del Mar Matarin	Dr Volkmar Frinken	Mr David Ben Haim	PhD Pradip Kalbar	PhD Student Georgios Ntanakas
Dr Lorenzo Guerrasio	Dr Maria Dolores de Hevia	Dr Witlef Wieczorek	Mr Emilie Saby	PhD Sanghamitra Nusrat Jahan	PhD Student Ioanna Kalograiaki
Dr Lorenzo Marcucci	Dr Maria Esther Pérez-Pérez	Dr Wolfgang Hieringer	Mr Emmanuel Boudard	PhD Savani Anbalagan	PhD Student Ioanna Markostamou
Dr Luca Acquarelli	Dr Maria Eugenia Sanz Gonzalez	Dr wolfgang mann	Mr Florian Boulnois	PhD SOMANANDA SANYAL	PhD Student Ioannis Pitsios
Dr Luca Nizzetto	Dr Maria Garcia	Mr Andre Kruger	Mr Frederic Le Moigne	PhD Sonu Kumar	PhD Student Ioannis Seferis
Dr Luca Persichetti	Dr María Gonzalez-Bejar	Mr Andreas Schuster	Mr Jean-Baptiste Bossa	PhD Student Abhijeet Nayak	PhD Student Ioannis Stogiannis
Dr Luca Ronconi	Dr María Moreno Morcilllo	Mr Ansgar Scherp	Mr Jrmie Dubois-Lacoste	PhD Student aditya sankar	PhD Student Kalliopi-Eleni Tsafou
Dr Luca Salassa	Dr Maria Pilar Garcia Gomez	Mr Benedict Halbroth	Mr Laurent Massoptier	PhD Student Ajay Kumar	PhD Student Konstantinos Megalooikonomou
Dr Lucia Burgio	Dr Maria RAZZAUTI	Mr Bernhard Siegfried Arthur Schuberth	Mr Maxime Bourgognon	PhD Student Akanksha Raj	PhD Student Maria Frantzi
Dr lucia martinelli	Dr maria romeralo	Mr Christian Wunder	Mr Nicolas Fazilleau	PhD Student Amarendar Chelumalla	PhD Student Maria-Anna Chalkiadaki
Dr Luigi Ponti	Dr Maria Sabater Lleal	Mr Christof Hertel	Mr Nicolas Manel	PhD Student Amber Tiwari	PhD Student Mariangela Sfouni-Grigoriadou
Dr Luigi Tamè	Dr Maria Sanchez-Contreras	Mr Daniel Abler	Mr Pascale Gerbault	PhD Student Anandi Rajan	PhD Student Marios Koulakis
Dr Luisa Corrado	Dr Maria Segovia	Mr David M. Straub	Mr Petru JITARU	PhD Student Anil Patel	PhD Student Miltiadis Alexios Papadopoulos
Dr Maiko Favaro	Dr Maria-Jesus Garcia	Mr Dominik Hartmann	Mr Sébastien Gondet	PhD Student Ann Rose Bright	PhD Student MILTIADIS GYMNOPOULOS
Dr Manuela Giovanetti	Dr Marian Llamas	Mr Enno Uhl	Mr Thomas Seiller	PhD Student Annasaheb Kolpe	PhD Student Nikoletta Giantsiou
Dr Marcello Sano	Dr Mario Lanza	Mr Fuad Hajji	Mr Wilfrid Mazier	PhD Student Arindam Sen	PhD Student Nikoletta Skordaki
Dr Marcello Sega	Dr Marta Gonzalez-Silveira	Mr Holger Kuehlwein	Mr Yoann Louvet	PhD Student Arpit Jain	PhD Student Olga Tsoumani
Dr Marco Antonsich	Dr Marta I. Hernández	Mr Jan Gorisch	Ms Adeline Marie Julianne Patard	PhD Student Arunjunai Raja Shankar Santha Kumar	PhD Student Panagiota (Naya) Giannakopoulou
Dr MARCO BERCI	Dr Marta Ruiz Costa-jussà	Mr Jann Schlimme	Ms Armelle Klopstein	PhD Student Bala Attili	PhD Student Panagiota Kotsila
Dr Marco Berritta	Dr marta segarra	Mr Johan Faust	Ms Camille Larue	PhD Student Bhavna Rani	PhD Student Paraskevi Zerva
Dr Marco Bonato	Dr Marta Vergara Irigaray	Mr Johannes Bill	Ms Celine Cantat	PhD Student DEBARUN DHALI	PhD Student Pavlos Geranios
Dr Marco Gavagnin	Dr Martí Gich	Mr Johannes Thun	Ms Coralie Chanvillard	PhD Student Debashish Sahay	PhD Student Spyridon Argyropoulos
Dr Marco Gebiola	Dr Marusela Oliveras Salva	Mr Jost Henkel	Ms Faten Hariri	PhD Student Deepak Baby	PhD Student Stylianos Tsopanidis
Dr Marco Iuliano	Dr Mauricio Rico	Mr Klaus Moellenhoff	Ms Jennifer Stanic	PhD Student Dhivyaa Rajasundaram	PhD Student Vasileios Mantzios
Dr Marco Mason	Dr Meritxell Nus	Mr Kristof Kessler	Ms Johanna Berge	PhD Student Divyashree Nageswaran	PhD Student Vasiliki Tsikourkitoudi
Dr Margherita Yayoi Turco	Dr Miguel A. Martínez-Botí	Mr Martin Rube	Ms Julie Movellan	PhD Student Gurucharan Vijay Karnad	PhD Student Vasilis Thanasoulis
Dr Maria Archidiacono	Dr Miguel A. Matilla-Vazquez	Mr Martin Weissenborn	Ms Laura Vergoz	PhD Student HARDLY JOSEPH CHRISTOPHER	PhD Student Yannis Tsoumpas
Dr Maria Cristina ciocci	Dr Miguel Cornelles Soriano	Mr Mathias Gehrmann	Ms Pauline Rasera	PhD Student JOHN PRAKASH SUSAINATHAN	PhD Theodoros Tzamkiozis
Dr Maria Daniela Poli	Dr Miguel Nacenta	Mr Matthias Brugger	MSc Alexis Tantet	PhD Student Kanishka Sharma	PhD Theofanis Plagianakos
Dr Maria Immacolata Ferrante	Dr Miguel Rubio-Roy	Mr Max Mustermann	MSc Antoine Moulet	PhD Student Kishore Kumar Jagadeesan	PhD Vassilios Solachidis
Dr Maria Pennuto	Dr Monica Cartelle Gestal	Mr Miguel Haubrich Seco	MSc Cedric Twardzik	PhD Student Maaz Farooqui	Prof Christophoros Nikou
Dr Maria-Antonietta Buccheri	Dr Mónica Giménez-Marqués	Mr Philipp Heck	MSc Erwin Frets	PhD Student Michael kingston	Prof George Dassios
Dr Maria-Emanuela Alberti	Dr Montserrat Casals-Ruiz	Mr Philipp Latzel	MSc François-Xavier FAY	PhD Student MOHAMMAD MERAJ ALAM	Prof George Petekidis
Dr Mariachiara Barzotto	Dr Muriel Rovira Esteva	Mr Simon Burmester	MSc Géraud Guilloud	PhD Student Mohammad Noaman	Prof Georgia Papaefthymiou
Dr Marianna Obrist	Dr Mykola Sochynskyi	Mr Simon Stroß	MSc Guilhem Coussanes	PhD Student Mukundan Srinivasan	Prof Georgios Vougioukalakis
Dr Marianna Salvioli	Dr NAGORE ORTIZ VITORIANO	Mr Sven Lauer	MSc Jean-Gabriel Brisset	PhD Student NARASIMHA RAO BOLLA	Prof Ioannis Kontoyiannis
Dr Marino Moretti	Dr Natacha Aguilar Soto	Mr Thomas Bollerhoff	MSc Luiz Domeignoz Horta	PhD Student Naveen Kumar Desiraju	Prof Michail Lagoudakis
Dr Mario Bonato	Dr Natalia Balcazar Navarro	Mr Timo Stukenkemper	MSc Marion Ripert	PhD Student NIRMAL RAMAN KANNAIYAN	Prof NIKOLAOS Labrou
Dr mario martinelli	Dr Noemi Guil	Mr Tobias Schubeis	MSc Michael MARIA	PhD Student Nirmalesh Kumar Sampath Kumar	Prof Nikos Kalampalikis
Dr Mario Montopoli	Dr Noemi Ruiz-Lopez	Mr Toni Froehlich	MSc Nathalie Müller	PhD Student Ohm Prakash	Prof Panagiotis Macheras
Dr Marta Lazzeroni	Dr Nuria Blanco-Delgado	Mr Uwe Schneidewind	PhD Alexandre Courtiol	PhD Student Parag Wate	Prof Takis (Panayotis) Pappas
Dr Martina Renzi	Dr Núria Jiménez García	Ms Anne Schlag	PhD Alexandre HYAFIL	PhD Student Payal Tyagi	Prof Vassilis Charmandaris
Dr Martino Ambrosini	Dr Nuria Sanchez Coll	Ms Daniela Marzi	PhD Angela Cheptea	PhD Student Pradeep Durgam	Research Assistant AIKATERINI TZAVELLA
Dr Massimiliano Di Luca	Dr Olalla Vázquez	Ms Hennen Eva	PhD Aurele Piazza	PhD Student Pramod Kumar Sharma	Research Assistant Angelos Mallios
Dr Massimo Bonini	Dr Olatz Lopez-Fernandez	Ms Henrike Mueller-Werkmeister	PhD Benoit Miotto	PhD Student Pranali Shah	Research Assistant Dimitrios Zografopoulos
Dr Massimo Moraglio	Dr Omar Boutureira	Ms Isabel Hopp	PhD Cécile ALBERT	PhD Student Prathibha Reddy Gajjala	Research Assistant Petroula Tsitlakidou
Dr Massimo Prearo	Dr Oscar Corcho	Ms Juliane Munch	PhD Cedric Bardy	PhD Student Priya Dwivedi	Research Associate Constantina Kourmentza
Dr Massimo Santoro	Dr Oscar Lozano Ventura	Ms Manuela Pisch-Mielke	PhD Cendra Agulhon	PhD Student Rahul Mishra	Research Associate Eleni Koutsoumpeli
Dr Matteo Ciucci	Dr Oscar Mendoza	Ms Ruth Judith Horn	PhD christophe merceron	PhD Student Rahul Mohanty	Research Associate Emmanouil Alexakis
Dr Matteo Ferrari	Dr Oskar Ortiz	Ms Samantha Scott Reiter	PhD Cyrille Botte	PhD Student Ramviyas Nattanmai Parasuraman	Research Associate Theodota Lagouri
Dr Matteo Iannacone	Dr Pablo Amoros	Ms Sara Koeser	PhD David Thomae	PhD Student Richa Pandey	Sc Despina Papakonstantinou
Dr Matteo Tommasini	Dr Pablo Garcia Ortega	Ms Stefanie Kroker	PhD Dimitri Perrin	PhD Student Rohan Soman
Dr Mattia Frontini	Dr Pablo Lodeiro Fernández	Ms Susanne Durst	PhD Doriane Lorendeau	PhD Student Sameer Dixit
Dr Mauro Conti	Dr Pablo Mauleon	Ms Susanne Schneider	PhD Emilie Boissin	PhD Student Samridh Jaiswal
Dr Michael Nones	Dr Pablo Vergara	MSc Alexandra Julia Langner	PhD Emilie MEAUX	PhD Student SANATHANA KONUGOLU VENKATA SEKAR
Dr Michela Catto	Dr Patricia Hernandez Ortiz	MSc Amelie Huber	PhD Emilyne Blattes	PhD Student Saranya Balasubramanian
Dr Michela Clemente	Dr Pau Rué	MSc Arleta Kuczynska	PhD eric röttinger	PhD Student Saumya Dabral
Dr Michele Gazzola	Dr Pedro Crevillén	MSc Dirk Simon	PhD Fabien Racape	PhD Student Saurabh Jain
Dr Michele Simonato	Dr Pedro Serna-Merino	MSc Ivan Flammia	PhD Gildas Loussouarn	PhD Student Sharavan Vishaan Venkateswaran
Dr Michele Trenti	Dr Pere Picart	MSc Julian Hertel	PhD GOEBEL François-Régis	PhD Student Shashank Shekhar Harivyasi
Dr Milo Malanga	Dr Pilar Bustos Sanmamed	MSc Katharina Ebell	PhD Grégory Bouchaud	PhD Student Shoubhik Gupta
Dr MOIRA CIARDI	Dr Priscilla Canizares	MSc Kathrin Hnida	PhD Gregory Wurtz	PhD Student Shubham Kumar
Dr Nadia Ameli	Dr Rafael Muñoz-Espí	MSc Kathrin Laeger	PhD Helene Robert-Boisivon	PhD Student Soumya KATAMANI
Dr Nicola Fameli	Dr Rafael Vázquez-Manrique	MSc Marleen de Kramer	PhD Hervé Turlier	PhD Student Soumya Ranganathan
Dr Olivia Campana	Dr Ramiro Ernesto Logares	MSc Mussie Beian	PhD Hugues Dardente	PhD Student Sowmya Somanchi
Dr Ornella Belvedere	Dr Ramses Martinez	MSc Navina Chrobok	PhD Jean-Luc Runavot	PhD Student Stuti Prakash
Dr Paolo Ferrara	Dr Raquel Benavides	MSc Nicholas Shore	PhD Jean-Philippe Berteau	PhD Student Subhajit Ghosh
Dr Paolo Lucci	Dr Raquel Fernández Varela	MSc Nils Nothnagel	PhD Joannès Berque	PhD Student Sundararajan Thirumalai
Dr Paolo Politi	Dr Raquel Garcia	MSc Silvan Kuttimalai	PhD Johan Duchene	PhD Student Tarique Siddiqui
Dr Paolo Rossetti	Dr Raul Delgado-Morales	MSc Simon Wiedemann	PhD Judith Mine-Hattab	PhD Student V K THALAKKATUKALATHIL VINOD
Dr Paolo Rumori	Dr Raul Rodrigo Gomez	MSc Thomas Wagner	PhD Julie Dinasquet	PhD Student Vaibhav Diwan
Dr Patrizia Ferretti	Dr regina antoni alandes	MSc Verena Schubert	PhD Julie Seibt	PhD Student Varun Ojha
Dr Patrizia Tenerelli	Dr Regina Gabilondo Toscano	MSc Wiebke Manuela Schulze	PhD Lucie Penin	PhD Student Vishal Parmar
Dr Piera Luisa Ghia	Dr Reyes Benlloch Ortiz	PhD Alexander Wittig	PhD Ludivine Breger	PhD Student Vivek Thakare
Dr Pierantonio Laveneziana	Dr Reyes Calvo	PhD Andreas Haag	PhD Manar AOUN	PhD THIMIRI DEEPAK
Dr Pietro Panzacchi	Dr Roberto Guzman de Villoria	PhD Andreas Mund	PhD marie humbert-claude	Prof Anju Bhasin
Dr Pietro Roversi	Dr Roberto Suarez Candel	PhD Anja Meissner	PhD Marlene Dreux	Prof Bhupendra Dev
Dr Rachele Dubbini	Dr Rocio Borrego Varillas	PhD Annikka Polster	PhD mathieu gabut	Prof Bodh Raj Mehta
Dr Raphael Pfattner	Dr Rocio Garcia Carrion	PhD Benjamin Auffarth	PhD Maxime Durka	Prof Gopalan Rajaraman
Dr Riccardo Albertoni	Dr Rocio Micaela Crespo Quesada	PhD Catherine Müller	PhD Michael Nicolas	Prof Kotte Tulasi Ramakrishna Reddy
Dr Riccardo Biondi	Dr Rodrigo Bermejo	PhD Christian Kuehn	PhD Michel Thiebaut de Schotten	Prof Mohammad Muneer
Dr Riccardo De Maria	Dr Rosa Ana López	PhD Daniel Abankwa	PhD Morgane RIVOAL	Research Assistant Akhil Chandran Mukkattu Kuniyil
Dr Riccardo Fini	Dr Rosa Busquets Santacana	PhD Elisabeth Kohls	PhD Patrik Lambert	Research Assistant Tibin Joseph
Dr Roberto Cerbino	Dr Rubén G. Mateo	PhD Elke Binder	PhD Raghu Suryanarayanan	Research Associate Abhishek Singh
Dr Rosanna Caliandro	Dr Ruth Garcia de la Calle	PhD Frank-Michael Schleif	PhD Romain Libbrecht	Research Associate GOPAL PAWAR
Dr Sabrina Marchetti	Dr Salva Alcántara	PhD Gerhard Wingender	PhD Sabine Chiesa	Research Associate Reji Manjunathan
Dr Salvatore Gaspa	Dr Salvador Lladó Fernández	PhD Harald Schneider	PhD Sandra Chanraud
Dr Salvatore Martire	Dr Sara Fuertes	PhD Isabel Poschke	PhD Stéphane Vinit
Dr Serena Bertone	Dr Sara Regina Martin Roman	PhD Jan Korbel	PhD Student Alba PELLAROQUE
Dr Serena Lunardi	Dr Sara Vicente	PhD Jasper Heinzen	PhD Student Alexandre Bouquin
Dr Sergio Consoli	Dr Silvia Angles	PhD Jens Rohlfing	PhD Student Alice Badin
Dr Sergio Rossi	Dr Silvia Catalan Ruiz	PhD Karin Weigelt	PhD Student Anaïs Guillem
Dr Silvana Botti	Dr Silvia Osuna	PhD Kathrin Pallauf	PhD Student anthony lagnado
Dr Silvano Fares	Dr Silvia Parajes Castro	PhD Katja Rangsivek	PhD Student Benjamin Borie
Dr Silvia Campello	Dr Silvia Valenzuela Lamas	PhD Katrin Heimann	PhD Student Benjamin Cauchi
Dr Silvia Giordani	Dr Soledad Royo Gracia	PhD Magdalena Gamm	PhD Student Boris Teillant
Dr Silvia Riva	Dr Sonia Hernández Plaza	PhD Marcel Bradtmöller	PhD Student Boualam Brahim
Dr Silvia Vidali	Dr SORAYA SANGIAO	PhD Marko Swoboda	PhD Student Caroline BOSCH
Dr Simone Meloni	Dr Susana Liebana Girona	PhD Martin Schimmel	PhD Student Cassandre Kinnaer
Dr Simone Tanzi	Dr Teresa Bravo	PhD Maximilian Haussler	PhD Student Cecile Cres
Dr Simonetta Rubol	Dr Teresa Lopez-Leon	PhD Melanie Vauclair	PhD Student Celine Mercier
Dr Sonja Rossi	Dr Teresa Madurell	PhD Michael Gastner	PhD Student Charles Mignon
Dr Stefania Gastaldi	Dr Teresa Martinez del Campo	PhD Michael Goldflam	PhD Student Charlotte PAVAGEAU
Dr Stefania Trovati	Dr Unai Atxitia Macizo	PhD Michael Lutteropp	PhD Student Clement Doire
Dr Stefano Bertea	Dr Vanessa Sancho Shimizu	PhD Miriam Kyselo	PhD Student Cyril Laplane
Dr Stefano Braghiroli	Dr Veronica Bermudez	PhD Moritz Mueller	PhD Student Elodie André
Dr Stefano Nicotri	Dr Vicenta Salvador Recatala	PhD Patricia Wecker	PhD Student Emmanuel TIREL
Dr Stefano Pascucci	Dr Victor J. Cardarso Busto	PhD Philipp Seib	PhD Student Fabienne Musseau
Dr Stefano Santaguida	Dr Victor Rodriguez Galiano	PhD Raimund Schmolze	PhD Student Ghislaine Lioux
Dr Stefano Tiozzo	Dr Victor Vilarrasa	PhD Sabine Hoidn	PhD Student Guillaume Doisy
Dr Stefano Visintin	Dr Victoria Gomez Almagro	PhD Sebastian Wallot	PhD Student Hugues-Yanis Amanieu
Dr Stefano Zibetti	Dr Violeta Irene Simón-Porcar	PhD Student Alexander Dreismann	PhD Student Jean Froment
Dr Stefano Zucca	Dr Violeta Munoz-Fuentes	PhD Student Alexander Stäblein	PhD Student Jean-Marc Billod
Dr Teodoro Katinis	Dr Xabier Cid Vidal	PhD Student Alexandra Paul	PhD Student Jennifer David
Dr Teresa Scolamacchia	Dr Xabier Iturbe	PhD Student Andreas Benker	PhD Student Johan Zicola
Dr thomas margoni	Dr xavier salvatella	PhD Student Andreas Hoefer	PhD Student Jonathan Tournadre
Dr Tommaso Gili	Dr Xoana Gonzalez Troncoso	PhD Student Anne Iltzsche	PhD Student Julie Oppenheimer
Dr Tommaso Piffer	Dr Yolanda Salinas Soler	PhD Student Astrid Junghans	PhD Student Julien Girardon
Dr Valentina Bisogni	Dr Zoe Falomir	PhD Student Aylin Metzner	PhD Student Karim Hamiche
Dr Valentina Melchiorri	Mr Adrián Posado Fernández	PhD Student Carsten Malisch	PhD Student Lior GEFEN
Dr Valentina Vadi	Mr Albert Caubet	PhD Student Christian Jenne	PhD Student Lisa King
Dr Valeria Pettorino	Mr Alejandro Sanchez sanchez	PhD Student Christina Lehning	PhD Student Margot Pasternak
Dr Vincenzo Giannini	Mr Alfonso Lema	PhD Student Christoph Feinauer	PhD Student Mathieu Baudin
Dr Vincenzo Starinieri	Mr Alvaro Gordillo	PhD Student Christopher Heise	PhD Student Mathilde Daniau
Dr Viviana Re	Mr Andres Ozaita	PhD Student Claudia Lindemann	PhD Student Matthieu Florentin
Dr Wainer Vandelli	Mr Carlos Abellan Beteta	PhD Student Claudia Stummer	PhD Student Michele Lucente
Dr Zeila Zanolli	Mr Carmen Limon	PhD Student Dominik Sperlich	PhD Student Mikael Pezet
Dr Zoraide Granchi	Mr Cristobal Pagan Canovas	PhD Student Frank Koslowski	PhD Student Nadine Vermorel
Mr Alberto Gregori	Mr Daniel Pla Queral	PhD Student Frauke Tillmans	PhD Student Nicolas Baert
Mr Alessandro Michel Brunetti	Mr Daniel Snchez Parcerisa	PhD Student Jakob Matthias Krämer	PhD Student Nicolas Martin-Beaumont
Mr Alessandro Sciarra	Mr Enrique Herraiz Lalana	PhD Student Jan Hendricks	PhD Student Noémie Dam
Mr Alfonso Valentino Casalini	Mr Guzmn Snchez	PhD Student Jana Kemnitz	PhD Student Pierre Vogler-Finck
Mr Andrea Locatelli	Mr hector Cabrera Bermejo	PhD Student Johannes Nils Raabe	PhD Student Pierre-Yves TOURNIGAND
Mr Andrea Maccagnan	Mr Ignacio Hernandez Vera	PhD Student Johannes Rebling	PhD Student Quentin Flamant
Mr Andrea Masi	Mr Ignacio Vega-Naredo	PhD Student Julia Bartenstein	PhD Student Quentin Flamant
Mr antonio quintieri	Mr Ivan Alvarez Leon	PhD Student Julia Klose	PhD Student Romain Brevet
Mr Carlo Quaglia	Mr Jorge Julvez	PhD Student Julia Seiter	PhD Student Sabine Le Gall
Mr Ciro Petrone	Mr Jose Carlos Villacorta Martin	PhD Student Julien Pohl	PhD Student Serena Bochereau
Mr Claudio Satriano	Mr Juan Delgado San Martin	PhD Student Kathleen Lehmann	PhD Student simon senecal
Mr Cristiano Cellini	Mr Juan Ignacio Climente	PhD Student Kevin Schönleber	PhD Student Sylvestre Bachollet
Mr Davide Musardo	Mr Juan M Cruz-Martinez	PhD Student Lars Büthe	PhD Student Sylviane Yoba
Mr Emanuele Bagnaschi	Mr Julio Gutierrez Moreno	PhD Student Leonard Frederic Henrichs	PhD Student Thibaud Richard
Mr Flavio Pendolino	Mr Luis Antonio Gonzalez Jaime	PhD Student Leonie Wenning	PhD Student Victor Boudara
Mr Francesco Ricci	Mr marcel boix alberich	PhD Student Martin Schmidt	PhD Virginie Moreaux
Mr Gabriele Tocci	Mr Omar Jabary Salamanca	PhD Student Martin Voigt	Prof Bruno AUVITY
Mr gennaro abbruzzese	Mr Pablo Leivar Rico	PhD Student Matthias Becker	Prof carmen Gervet
Mr Giacomo Bacci	Mr Pablo Minguez	PhD Student Matthias Geck	Prof Claude Miaud
Mr Giacomo Chiodarelli	Mr Pablo Roig	PhD Student Michael Stührenberg	Prof Didier Gascuel
Mr Giacomo D'Angelo	Mr Pedro Madrigal	PhD Student Nicole Stichling	Prof Didier Hocquet
Mr Giona Veronelli	Mr Ramn Gonzlez Mndez	PhD Student Pascale Eede	Prof Erwan Rauwel
Mr Giorgio Comai	Mr Ramon Cabiscol Martinoli	PhD Student Sabine Hanisch	Prof Gérard Colas des Francs
Mr Lorenzo Benedetti	Mr Ricardo Gozalbo	PhD Student Sandra Segeletz	Prof Gregory Kucherov
Mr lorenzo petralia	Mr sameer Joshi	PhD Student Sebastian Scholl	Prof J. Christophe Bureau
Mr Luca Giovannelli	Mr Sergi Blanco-Cuaresma	PhD Student Sina Westa	Prof Jean-Christophe Bureau
Mr Luca Roversi	Mr Xabier Osteikoetxea Vélez	PhD Student Steffen Meyer	Prof Jean-Marc MOURA
Mr Luca Tateo	Ms Andrea Laruelo	PhD Student Stephanie Redl	Prof Laurent Daudet
Mr Luigi Terracciano	Ms Anna Llus	PhD Student Tabea Schütze	Prof Laurent Lefèvre
Mr Mainardo Gaudenzi Asinelli	Ms Aurora Lopez Fogues	PhD Student Tabea Sturmheit	Prof Mariana Grana
Mr Marco Villa	Ms Aurora Lopez Fogues	PhD Student Tanja Brandt	Prof Marie-Dominique GALIBERT
Mr Mario Iurlaro	Ms Carmen Galn Soldevilla	PhD Student Tycho Mevissen	Prof Philippe LOSEGO
Mr Michele Doni	Ms Cristina Sala Valds	PhD Student Ulf-Niklas Berninger	Prof Pierre Denise
Mr Michele Grieco	Ms Elena Blanco Surez	PhD Student Verena Schmid	Prof Rodney O. Fox
Mr Nino Ruocco	Ms Elena Miguel	PhD Student Werner Pfeifer	Prof Sophie Pinchinat
Mr Paolo Aschieri	Ms Elsa Quintana Fernandez	PhD Thomas Kreuz	Prof Virginie Lecaudey
Mr Paolo Legrenzi	Ms Irene Alonso	PhD Thomas Stieglitz	Research Assistant gregory resch
Mr Paolo Sonego	Ms Judith Palacios Hernandez	PhD Thorsten Gantke	Research Associate ANNE-CLAIRE MARANGONI
Mr Pasquale Cervero	Ms Lara Gonzalez Villanueva	PhD Wolf von Klitzing	Research Associate Audrey Tourrette
Mr Pierpaolo Ricci	Ms Marina Fuentes Sainz	PhD Wolfram Bentz	Research Associate Céline Casenave
Mr Roberto D'Amico	Ms Marta Diez Castellnou	Prof Abdolkarim Sadrieh	Research Associate Doan Trung Luu
Mr Roberto Scigliano	Ms NOEMI LINARES PEREZ	Prof C. Dominik Güss	Research Associate Elodie Segura
Mr Salvatore Smirni	Ms Raquel Quintilla Mateo	Prof Carlos Collado Seidel	Research Associate Emilie PACARY
Mr Sebastian Lipari	Ms Seila Rodriguez Vilches	Prof Christian Igel	Research Associate Etienne Boulter
Mr Simone Mancini	Ms Yolanda Justo	Prof Christoph Wuelfing	Research Associate Fabrice Not
Mr Valerio Talarico	MSc Alejandro Bartolomé Ortega	Prof Christopher Deninger	Research Associate Julie Guillermet-Guibert
Ms Agnese Cretella	MSc Alejandro Fernandez Gomez	Prof Dieter Spreen	Research Associate Karim Si-Tayeb
Ms Alessandra Dal Secco	MSc Alejandro Rivero-Rodriguez	Prof F.Xavier Gomis-Rüth	Research Associate Nicolas Chamel
Ms Alice Pranzetti	MSc Ana Gómez	Prof Florian Kulzer	Dr Julie Gavard
Ms Ambra Milani	MSc Ana Isabel Borrachero Conejo	Prof Frank Boeckler	Dr Emily Julie Cottrell
Ms ANGELA RE	MSc Carlos Hernandez Matas	Prof Gabor Petzold	Dr Sylvain Loubéry
Ms Battaglia Marianna	MSc Daniel Mateos Molina	Prof Harald Schmidt	Dr Caroline Barelle
Ms Chiara Mari	MSc Diego Bellido	Prof Helmut Ehrenberg	Dr Francois Massol
Ms Claudia M Amatruda	MSc Estrella Lopez Gordo	Prof Ingo Dreyer	Ms Adeline Marie Julianne Patard
Ms Cristina Contartese	MSc Fernando Hueso Gonzalez	Prof Irmi Horst
Ms Elisabetta Di Bernardini	MSc Irene Marco-Rius	Prof Jens Rolff	PhD Judith Mine-Hattab
Ms Ester Pasquato	MSc Iria Regueiro	Prof Jochen Junker	Dr Nicolas Poirier
Ms Ilaria Santeramo	MSc Itamar Esdras Martínez García	Prof Julia Meyer	Associate Prof Marielle Debos
Ms Irene Matilde Chesini	MSc Jose Juan Rodriguez Henriquez	Prof Jürgen Prestin	Dr Xavier De Hatten
Ms Laura Cremonesi	MSc Lorena German	Prof Lukas Schmidt-Mende	Dr Helene Duez
Ms Laura Donatella Campisi	MSc Marc Renomc	Prof Michael Meyer-Hermann	Dr Romain Koszul
Ms Maria Magdalena Razalan	MSc Maria Jose Varela Canabal	Prof Oliver Niebuhr	Dr Julien Michel
Ms Mariangela Natale	MSc MARIA SALUD CAMILLERI RUMBAU	Prof Robert Manfred Nickel	Dr Laurent Rene Henri Ponson
Ms maura cimino	MSc Patricia Molina Costa	Prof Sabine Mihm	Dr Pierre Offre
Ms Oriana Rossi	MSc Pilar Gumà Claramunt	Prof Stefan Kubik	Assistant Prof Pierre-Yves Lozach
Ms Paola Grassi	MSc Raul Perulero Serrano	Prof Thomas Metzinger	Dr Julien Cucherousset
Ms Roberta Santarelli	MSc Yara Ruiz García	Prof Uwe Franz	Dr Romain Barnard
Ms Sara Bonfanti	PhD Ainara Vallejo	Prof Valentin Ivanov	PhD Student Julie Oppenheimer
Ms sara cazzoli	PhD Alba Llop Guevara	Prof Zoran Andjelic
Ms Serena Bisagni	PhD Alejandra Sanjuan Pla	Research Associate Eckart Woertz
Ms Serena Schiano	PhD Alex Perálvarez-Marín
Ms Silvia Puddu	PhD Alfredo Caro Maldonado
MSc Alberto Pollastro	PhD Alicia Arranz
MSc Alessandra Cecchini	PhD Alvaro Diez Revuelta
MSc Alessandra Pirovano	PhD Ana Belén Cerezo López
MSc Alessandro di Biase	PhD Ana Gonzalez-Paredes
MSc Alessandro Mancini	PhD Ana Iris Fernández-Llamazares
MSc Andrea Buratti	PhD Ana Martín Pardillos
MSc Andrea Matrisciano	PhD Ana Sousa Hervés
MSc Andrea Viti	PhD Andrés García García
MSc Antonio Magariello	PhD Andreu Blanco
MSc Beatrice Plazzotta	PhD Andreu Casali
MSc Carmelo Vicari	PhD Angel Fernandez Marti
MSc Cecilia Sebastiani	PhD Aritz Lopategi Martinez
MSc Claudia Granato	PhD Arkaitz Carracedo
MSc Claudia Moia	PhD Baldomero Alonso-Latorre
MSc Daniele Ancora	PhD BEATRIZ JURADO SANCHEZ
MSc Danilo Di Stefano	PhD Beatriz Sarriá
MSc Eberechi Innocentia Uwakah	PhD Begona Diaz
MSc Elena Dalla Benetta	PhD Carles Escera
MSc Elisa Canzani	PhD Carlos Guerrero
MSc ENZO FORNARI	PhD Carlos Perez Carmona
MSc Federico Lonardi	PhD Catalina Ana Rosselló Castillo
MSc Francesco Barbero	PhD Cesar Caballero
MSc Gian Maria Bocchini	PhD Concepcion Manzano
MSc Giovanna Avellis	PhD Cristina Diez
MSc Giovanni De Luca	PhD Cristina E Molina
MSc Giovanni Lapiccirella	PhD Cristina Llavata Peris
MSc Giovanni Ometto	PhD Cristina Pujades
MSc Giovanni Samuele Bolognese	PhD Cristina Sanchez-Castaneda
MSc Giulio Tirabassi	PhD Daniel Gonzlez
MSc Giuseppe Soligno	PhD Daniel Ramos
MSc Iolanda Decorato	PhD elena garcia bustamante
MSc Jason Sims	PhD Emma Martín Rodríguez
MSc Lara Ottaviani	PhD Enriqueta Alos
MSc Lara Trussardi	PhD Estanislao Nistal-Villan
MSc Laura Torino	PhD Ester Valls
MSc Liliana Gustini	PhD Esther Isorna Alonso
MSc Luisa Lucattini	PhD Esther Rodriguez
MSc Marco Pagliazzi	PhD Francisco J. Abascal
MSc Maria Antonietta Di Gesu	PhD Francisco Javier Sancho Pelluz
MSc Maria Cristina Carena	PhD Francisco López de Saro
MSc Maria Guidi	PhD Gemma Mestres
MSc Maria Letizia Lo Faro	PhD Guillermo Vidal de Miguel
MSc Martina Micai	PhD Héctor Martínez
MSc Massimiliano Siti	PhD Hugo Mélida
MSc Matteo Kirchner	PhD Irene García
MSc Mattia Gallizioli	PhD Iria Gomez Touriño
MSc Mauro Almangano	PhD Isabel Blasco Costa
MSc Mauro Nicolao	PhD Javier del Campo
MSc Melania Barile	PhD Javier delBarco-Trillo
MSc Michele Giunta	PhD Jesús Garrido Alcázar
MSc Nicola Cantarutti	PhD Joan Marc Rafí
MSc Nicola Gasparini	PhD Joan-Pau Sanchez
MSc Pietro Scaturro	PhD Joaquim Calbó
MSc Roberto D'Aquila	PhD Jorge Barbazán
MSc Rossella Suma	PhD Jose Antonio González Delgado
MSc Sara Perfetto	PhD Jose L Hueso
MSc Sara Tufi	PhD Jose M. Martin-Duran
MSc Serena Buscone	PhD Jose Ortiz
MSc Shadi Fatayer	PhD Jose Pablo Escobedo
MSc Silvio Matassa	PhD Jose Padial
MSc Simone Albino Zavattoni	PhD José Pedro Cerón Carrasco
MSc Simone Amoroso	PhD Josep Rotllant
MSc Simone Lion	PhD Juan Angel Recio
MSc Syed Adil Rab	PhD Juan M. Zaragoza
MSc TERESA PAONE	PhD Juan Manuel Ruiz Lozano
MSc Valentina Dallacasagrande	PhD Judit Huarte
MSc Valentina Magno	PhD Judith Domínguez Borràs
MSc Valeria Cigala	PhD Julia G Prado
MSc Valerio Muzi	PhD JULIANA REDONDO
MSc Vincenzo Maffione	PhD Koldo Trapaga Monchet
MSc Vladislav Gavryusev	PhD Laura Concostrina-Zubiri
PhD Adriano Garonna	PhD Lorenzo Melchor
PhD Alberta Maria Carlotta Spreafico	PhD M Pilar Aivar
PhD Alessandra Cifra	PhD Marçal Rossinyol
PhD Alessandra Pelosi	PhD Maria Beltran
PhD Alessandro De Mauro	PhD MARIA CARMEN MORENO MARRODAN
PhD Alessandro Tarozzi	PhD Maria Dolores Grillo Bosch
PhD Alessia Mortari	PhD Maria Jose Martin
PhD Alessio Cotugno	PhD Maria Jover-Cobos
PhD Alessio Delogu	PhD María Luisa Azpíroz
PhD Alfio Lazzaro	PhD Maria Luz Cayuela
PhD Alfonso Urbanucci	PhD Maria Mercedes Piles Rovira
PhD Andrea Bellucci	PhD Maria Ontiveros
PhD Andrea Ceccarelli	PhD Maria Tabernero Urbieta
PhD Andrea Faedo	PhD Maria Teresa Rubio Lopez
PhD andrea luca balbo	PhD Maria-del-Mar Inda
PhD Annalisa Zuccotti	PhD Mariana Boadella
PhD annamaria milazzo	PhD Marina Rubert
PhD ANTONELLA MARONE	PhD Marta Montori Grau
PhD Antonina Monaco	PhD marta tellez gabriel
PhD Antonino Flachi	PhD mercedes diaz-mendoza
PhD Antonio Gentilella	PhD Miguel F. Segura
PhD Azzurra Ruggeri	PhD Miguel Moreno-Risueno
PhD brigida proto	PhD Mireia Hernandez
PhD Camilla Pandolfi	PhD Monica Alvarez-Fernandez
PhD Carmen Leida	PhD MONICA CARRERA
PhD Caterina Maria Lombardo	PhD Monica Fernandez-Monreal
PhD Chiara Gasparini	PhD Monica Pernas Ochoa
PhD Chiara Tedaldi	PhD Myriam Calonje
PhD Christian Esposito	PhD Nemesio Rodriguez Fernandez
PhD Cinzia Maggiore	PhD Nuria Altimir
PhD Clelia Donà	PhD NURIA MORAL
PhD CRISTINA MATTIUCCI	PhD Oscar Muniz Pello
PhD Daniele Morselli	PhD Pablo Carbonell
PhD Davide Bianchi	PhD Pablo Fuciños
PhD Davide Consoli	PhD PATRICIA FERNANDEZ-ROBREDO
PhD Davide Gherdevich	PhD Patricia Marín Cepeda
PhD Davide Perini	PhD Patricia Ojer Ojer
PhD Eleonora Leucci	PhD Pedro Medina
PhD Eleonora Monaco	PhD PEDRO PERDIGUERO JIMÉNEZ
PhD Elisabetta Crocetti	PhD Pilar Munoz-Fernandez
PhD Elisabetta Micelotta	PhD Rocío López Posadas
PhD Elisabetta Nadalutti	PhD Rosa Binimelis
PhD Fabio Briscese	PhD Ruben Martinez-Buey
PhD Fabio Grassi	PhD Rubén Torices
PhD Federica Sebastiani	PhD Santiago Rello Varona
PhD Federica Villa	PhD Sergio Caja Galan
PhD Federico Aletti	PhD Sergio Tatay Aguilar
PhD Federico Mingozzi	PhD Silvestre Vicent Cambra
PhD Filippo Passerini	PhD Sofia Bayona Beriso
PhD Francesca Cavalieri	PhD Sonia Garcia Alcega
PhD Francesca Iannuzzi	PhD Sonia Guedan Carrio
PhD Francesca Stramandinoli	PhD Student Adrián Díaz
PhD Francesco Colonna	PhD Student Adrian Juan-Verdejo
PhD Francesco Giorgio Serchi	PhD Student Agnès Tort Piella
PhD Francesco Pastorelli	PhD Student Aitor Casas
PhD Francesco Zappon	PhD Student Alberto Jaspe
PhD Gaetano Verde	PhD Student Alberto Valero Gracia
PhD giacomo di benedetto	PhD Student ALEJANDRA CONSEJO
PhD Gian Mario Cosseddu	PhD Student Alvaro Leitao Rodriguez
PhD Giancarlo Sportelli	PhD Student Alvaro Martinez Ceballos
PhD Gianluca Marcotullio	PhD Student Ana Adrados Planell
PhD Giorgia Barboni	PhD Student Ana Causanilles
PhD Giorgio Pettinari	PhD Student Ana Pérez Gago
PhD Giovanna Maina	PhD Student Anahi Binagui-Casas
PhD Giovanni Cristina	PhD Student Andrea Enguita Marruedo
PhD Giulietta Minozzi	PhD Student Antón Fernández Fernández
PhD Giuseppe Maria de Peppo	PhD Student Antonio Serrano Salces
PhD Giuseppe Matteo Vaccaro Incisa	PhD Student Arantxa Blázquez Prunera
PhD Guido Volpi	PhD Student Ariadna Purroy Albet
PhD Ilaria Zanardi	PhD Student Arturo Blázquez Navarro
PhD Karina Ruiz	PhD Student Beatriz Martinez Burgo
PhD Lamberto Ballan	PhD Student Beñat Eguiluz Miranda
PhD Laura Morello	PhD Student Blanca Andres Valiente
PhD Laura Riva	PhD Student Borja Hernandez Crespo
PhD Laura Tosatto	PhD Student Candela Campos
PhD lia paola zambetti	PhD Student Carla Sanjurjo Soriano
PhD Liana Palermo	PhD Student Carlos Pérez Arroyo
PhD Lorenzo Di Biagio	PhD Student Celia María Castro Barros
PhD Lorenzo Veschini	PhD Student Cesar Augusto Fortes Lima
PhD Luca De Filippis	PhD Student Cinthya Véliz Montes
PhD Luca Pellegrinet	PhD Student Clàudia Aunós
PhD Luca Redaelli	PhD Student Coral Herranz-Lancho
PhD Luca Tiano	PhD Student Daniel Bravo Martinez
PhD Ludovico Geymonat	PhD Student Daniel Suárez Zamora
PhD Luisa Di Stefano	PhD Student Darío Vázquez Albacete
PhD Maddalena Nurchis	PhD Student David Hidalgo Medina
PhD Manuela D'Amen	PhD Student David Massa Lopez
PhD Marco Battiato	PhD Student Elena González Arribas
PhD Marco Noè	PhD Student Enrique del Sol Acero
PhD margherita la marca	PhD Student Enrique Gallego Colon
PhD Maria Cristina Crava	PhD Student Esther Samper Martínez
PhD Maria Grazia Ruocco	PhD Student Eva Camarillo Retamosa
PhD Maria Paola Bissiri	PhD Student Fernando Berro Jiménez
PhD Maria Spolidoro	PhD Student Fernando Jose Iglesias Garcia
PhD Mariangela Cavarelli	PhD Student Francisco Javier Coy Vergara
PhD Marianna Mamusa	PhD Student Francisco Javier Granados Ortiz
PhD Marilena Gallotta	PhD Student Francisco Manuel Pozo Pérez
PhD Mario Catarinella	PhD Student Francisco Molina López
PhD marta mameli	PhD Student Gabriel García Caballero
PhD Martina Lorenzetti	PhD Student Iratxe del Rio
PhD Massimiliano Carciofi	PhD Student Irene Ballesta Artero
PhD Massimo Vetrisano	PhD Student Irene Castellano Pellicena
PhD Matteo Galli	PhD Student irene Lopez
PhD Matteo Roggero	PhD Student Irene Miguel-Escalada
PhD Matteo Tonezzer	PhD Student Irene San Jose Garcia
PhD Mattia Fochesato	PhD Student Irene Siso Fuertes
PhD Maurizio De Pittà	PhD Student Isabel Fraga Dominguez
PhD Mauro Masiol	PhD Student Jaume Aguero
PhD melania michetti	PhD Student Jose Dolz
PhD Michele De Gennaro	PhD Student Juan Alberto Franco Sumariva
PhD Michele Nori	PhD Student Juan Francisco Zapata-Díaz
PhD Michele Orini	PhD Student Juan Ignacio Rodriguez
PhD Mirela Kuka	PhD Student Juan Manuel Adrián Segarra
PhD NA Guarin	PhD Student Júlia Comas-Barceló
PhD Nicola Poccia	PhD Student Julian Daich
PhD Paola Binda	PhD Student Laia Mira Pascual
PhD Paola Spadaro	PhD Student Laura Garcia Ibanez
PhD PAOLA TOME'	PhD Student Laura Sanguino Casado
PhD Paolo Cipollini	PhD Student Lidia Rodriguez Calleja
PhD Paolo Gradassi	PhD Student Llucia Albertí Servera
PhD Paolo Scussolini	PhD Student Lucia Perez Gandarillas
PhD Pasquale Pizzimenti	PhD Student Luis Bausá López
PhD Riccardo Bartolozzi	PhD Student Marc Cheah
PhD Riccardo Guidi	PhD Student Maria Barandalla
PhD Riccardo Puglisi	PhD Student Maria Barrera Verdejo
PhD Roberto Beccherle	PhD Student Maria Delso Vallejo
PhD Roberto Formisano	PhD Student MARÍA DOLORES GALLEGO MARTÍNEZ
PhD roberto giambruno	PhD Student María Magdalena Ramos Calles
PhD rosa bernardi	PhD Student Maria Muriel Gracia
PhD Rosanna Piccirillo	PhD Student Maria Valldeperas Badell
PhD Sabina Brevaglieri	PhD Student Marina Gutiérrez
PhD Sabrina Valetti	PhD Student Marina Martinez Garcia
PhD Salvatore Bagiante	PhD Student Marina Mora-Ortiz
PhD Sara Furlan	PhD Student Marta Abellán Flos
PhD Sara Piccirillo	PhD Student Marta Bolsa-Ferruz
PhD Sara Tognarelli	PhD Student Marta Dominguez Delmas
PhD Serena Petrocchi	PhD Student Marta Marin Barba
PhD Serena Zacchigna	PhD Student Marta Morillo
PhD Stefano de Bosio	PhD Student Miguel Lallena Arquillo
PhD Stefano Meroli	PhD Student Miguel Martínez Maestro
PhD Stefano Negro	PhD Student Monica Romera Hernandez
PhD stefano ranfone	PhD Student Nadejda Blagorodnova
PhD Student Achille Sassi	PhD Student Naiara Altuna
PhD Student Alberto Crivellaro	PhD Student Natalia Fernandez de Vera
PhD Student Alberto Gatto	PhD Student Nicolas Perez de la Mora
PhD Student Alberto Manfrin	PhD Student Oscar Fernandez
PhD Student Alberto Morando	PhD Student Óscar Torreño Tirado
PhD Student Alberto Nobili	PhD Student Pablo Fernandez Medina
PhD Student Alessandra Lacetera	PhD Student Pablo Tierz
PhD Student Alessandra Merenda	PhD Student Patricia Marti Puig
PhD Student Alessandra Treviso	PhD Student Pau Brunet Navarro
PhD Student Alessandro Leonardi	PhD Student Pau San Valero Tornero
PhD Student Alessandro Pellis	PhD Student Pedro Huertas Leyva
PhD Student Alessia Ferrarini	PhD Student Rafael Díaz
PhD Student Alessia Peviani	PhD Student Rafael Tedin Alvarez
PhD Student Andrea Castrichini	PhD Student Raquel Fernandez del Rio
PhD Student Andrea Cipri	PhD Student Raul Aranda-Marco
PhD Student Andrea De Franco	PhD Student Raul Pagan Muñoz
PhD Student Andrea Fasano	PhD Student Raul Palacios
PhD Student Andrea Giannuzzo	PhD Student Ricard Alert
PhD Student Andrea Guariso	PhD Student Ricardo Valdés-Bango Curell
PhD Student Andrea Resmini	PhD Student Sergio Crespo-García
PhD Student Anna Caiazzo	PhD Student Sergio Garcia Martin
PhD Student Anna Cupani	PhD Student Silvia Lopez-Lastra
PhD Student Anna Gardumi	PhD Student Silvino Presa
PhD Student Anna Maria Mandalari	PhD Student Susanna Lladó
PhD Student Antonella Guzzonato	PhD Student Teresa Palao Garcia
PhD Student Antonio Acri	PhD Student Teresa Sánchez Pascua
PhD Student Antonio Ammirati	PhD Student Xinyi Chen
PhD Student Antonio Calò	PhD Student ZENEIDA HERRERA PÉREZ
PhD Student Arianna Marini	PhD Susana Camacho Romero
PhD Student Ascanio Digiacomo	PhD Susana Carmona
PhD Student Beatrice Bedussi	PhD Tania Morán Luengo
PhD Student Beatrice Bernocchi	PhD Tania Romacho
PhD Student Beatrice Gaviraghi	PhD Victor Cardenes Van den Eynde
PhD Student Benedetta Bonito	PhD Virginia Arechavala-Gomeza
PhD Student Benedetta Maria Squeo	PhD Xavier Garcia Acosta
PhD Student Camilla De Nardis	PhD Yolanda Melero
PhD Student Carolina Eleonora Lavecchia	Prof Antonio Rodriguez-Moreno
PhD Student Cecilia Romanò	Prof Coral Barbas
PhD Student Chiara Di Bari	Prof David Gonzalez Rodriguez
PhD Student CHIARA FALCICCHIA	Prof Eduardo Saiz Gutierrez
PhD Student Chiara Formica	Prof Emilio Artacho
PhD Student Chiara Greganti	Prof Ester Ruiz Morales
PhD Student chiara paris	Prof Gregorio Iglesias
PhD Student Cinzia Spinato	Prof Ignacio Martin Gullon
PhD Student Claudia Acquistapace	Prof JESUS INIESTA
PhD Student Claudia Siverino	Prof Jorge Ripoll
PhD Student Claudio Colangeli	Prof Jose L. Moraga
PhD Student Claudio Stamile	Prof Juan Carlos Ruiz-Morales
PhD Student Corrado Grassi	Prof Marta Elvira
PhD Student cristina viganò	Prof Miguel A Vicente
PhD Student Daniel Guariglia	Prof Patricia Faraldo Cabana
PhD Student Daniela Begolo	Prof Patricia Luis Alconero
PhD Student Daniele Mantione	Prof Roc Ros
PhD Student Dario Turco	Research Assistant Agustí Lledó Ponsati
PhD Student Davide Blasi	Research Assistant Fernando Ramiro Manzano
PhD Student Davide Cieri	Research Assistant José Francisco Blanco Villalba
PhD Student Davide Monsorno	Research Assistant Lorena Saelices Gómez
PhD Student Diego Di Battista	Research Assistant Pablo Rodriguez-Lopez
PhD Student Edoardo Andrea Cutolo	Research Assistant Raquel Cunill Artigas
PhD Student Elena Palmieri	Research Assistant Vanesa Nieto-Moreno
PhD Student Elisa Calignano	Research Associate Carlos Hernandez-Monteagudo
PhD Student Emilio Di Lorenzo	Research Associate Ignacio Perez de Castro
PhD Student Enrico Brinciotti	Research Associate Javier Carrasco
PhD Student Erica Valentini	Research Associate Maria Inmaculada Gonzalez-Gonzalez
PhD Student ettore lappano	Research Associate Meritxell Genescà Ferrer
PhD Student Eugenio Zoni	Research Associate Rafael Leon
PhD Student Fabio De Rosa	Research Associate Sergio Roa
PhD Student fabrizio gianni	Research Associate Xavier Seuba
PhD Student Federica Antico
PhD Student Federica Cariti
PhD Student Francesco Canfarotta
PhD Student Francesco Giorgio
PhD Student Francesco Sanna
PhD Student Gabriele Valentini
PhD Student Gaetano D'Amato
PhD Student Giacomo Priante
PhD Student Giampiero Accardo
PhD Student Gianmarco Mastrogiovanni
PhD Student Gianpaolo Gulletta
PhD Student Giorgia Fiaschi
PhD Student Giorgio Chianello
PhD Student Giovanna Muggiolu
PhD Student Giulia Bianchi
PhD Student Giulia Cazzanelli
PhD Student Giulia Digeronimo
PhD Student Giulia Maglieri
PhD Student Guido Grossi
PhD Student Irene Beriotto
PhD Student irene guerri
PhD Student Jacopo Timini
PhD Student Jessica Zordan
PhD Student Laura Franconi
PhD Student Laura Galbusera
PhD Student Lenny Zaffaroni
PhD Student Luca Bertoluzzi
PhD Student Luca Pietrobon
PhD Student Mara Saccomano
PhD Student Marco Agnelli
PhD Student Marco Agnes
PhD Student Marco Arzeo
PhD Student Marco Grottoli
PhD Student Marco Mambretti
PhD Student Marco Mannisi
PhD Student Marco Minissale
PhD Student Marco Siddi
PhD Student marco tito bordogna
PhD Student Maria Ada Prusicki
PhD Student Maria Chiara Biagi
PhD Student Maria Chiara Iorio
PhD Student Maria Cristina Battaglia
PhD Student Maria Domenica Costantino
PhD Student Maria Elena Giannaccini
PhD Student maria elena verdenelli
PhD Student Maria Girolama del Rosso
PhD Student Maria Penzo
PhD Student Marianna Bacci Tamburlini
PhD Student Marisa Punzi
PhD Student Marko Jankovic
PhD Student Marta Gallo
PhD Student martina ambrogi
PhD Student Martina Zanella
PhD Student Massimiliano Ferrucci
PhD Student michela comune
PhD Student Michele Martini
PhD Student Michele Pavan
PhD Student Michele Voto
PhD Student Nicola Berti
PhD Student Nicola Carboni
PhD Student Nicolas Di Vara
PhD Student nicoló bonora
PhD Student Nunzia Giorgia Ferrara
PhD Student Oleksandra Seliverstova
PhD Student Paola Bonaventura
PhD Student PAOLA PISCITELLI
PhD Student Paolo Giangrande
PhD Student Paolo Pagano
PhD Student Paolo Roberto Saraceni
PhD Student Paride Nardone
PhD Student Pasquale Cilibrizzi
PhD Student Pietro Romanazzi
PhD Student Riccardo Sangermano
PhD Student Roberta Rovito
PhD Student Roberto Annunziata
PhD Student Roberto Morabito
PhD Student Rocco Pulizzi
PhD Student Rocco Sebastiano
PhD Student Salvatore Costanzo
PhD Student Salvatore Mesoraca
PhD Student Sara Budinis
PhD Student Serena Carelli
PhD Student Serena Flori
PhD Student Serena Maggioni
PhD Student Silvia Dalba
PhD Student Silvia Francesca Varotto
PhD Student Silvia Galante
PhD Student silvia sanvido
PhD Student Simone Mastrogiacomo
PhD Student Simone Moretti
PhD Student Simone Sorgato
PhD Student Sonia De Munari
PhD Student Sonia Giubergia
PhD Student STEFANIA DEL PRETE
PhD Student Stefania Geraci
PhD Student Stefania Milano
PhD Student Stefano Aime
PhD Student Stefano Origlia
PhD Student Tania Chiarini
PhD Student Tina Magazzini
PhD Student Tiziana Rosa
PhD Student Tobias Ansaldi
PhD Student Valentina Ferro
PhD Student valentina imparato
PhD Student Valentina Pia
PhD Student Valeria Davi'
PhD Student Valeria Villanova
PhD Student Vania Baldan
PhD Student Viola Boccasavia
PhD Student Vittorio D'Ortona
PhD Student Walter Minnella
PhD Tommaso D'Antino
PhD Tommaso Mingazzini
PhD Ugo Marzocchi
PhD Umberto Banderali
PhD Umberto Maio
PhD Valentina De Romeri
PhD Valentina Lodde
PhD Valentina Naglieri
PhD Valentina Pirazzoli
PhD YARI CIRIBILLI
Prof Alessandro Casavola
Prof Angelo Paone
Prof Antonio Di Pietro
Prof Barbara Rossi
Prof Carla Cimatoribus
Prof Carlo Giovanni Madonna
Prof Christine Nardini
Prof Costantino Giaconia
Prof Domenico Gallipoli
Prof Domenico Pirozzi
Prof Elisabetta Tedeschi
Prof Fabio Ancona
Prof Federico Rosei
Prof Gabriele De Anna
Prof Giam Pietro Cipriani
Prof luca queirolo palmas
Prof Luigi Caranti
Prof Marta Volonteri
Prof Massimo Zaccaria
Prof Michele Flammini
Prof Paolo Davide Farah
Prof Paolo Gambino
Prof Paolo Guasoni
Research Assistant Alice Antoniacomi
Research Assistant Barbara Capuccini
Research Assistant BIANCA RITA PISTILLO
Research Assistant Daniela Assunta Quadrino
Research Assistant Daniele Pranzetti
Research Assistant Federico Giuseppe Padua
Research Assistant Roberto Colozza
Research Assistant Sebastiano Garroni
Research Assistant Silvana Munzi
Research Assistant Stefano Alois
Research Associate Alessio Bartolacelli
Research Associate Anna Gianfreda
Research Associate Deodato Tapete
Research Associate Francesco Cottone
Research Associate Giulia Mollica
Research Associate giulio bonelli
Research Associate Igor Branchi
Research Associate Leonardo Elia
Research Associate Lucia Angelino
Research Associate Marco Endrizzi
Research Associate Maria Penelope De Santo
Research Associate Martino Calamai
Research Associate Matteo Vigo
Research Associate Mattia Terenghi
Research Associate Paola Ferruta
Research Associate Paolo Giordano
Research Associate Paolo Tieri
Research Associate Paul Claude Diemoz
Research Associate Roberto Frega
Research Associate Rosaria Tondi
Research Associate Salvator-John, A. Liotta
Research Associate Sandro Perrone
Research Associate Simone Vincenzi
Research Associate Stefano Borgo
Research Associate stefano stella
[truncated: 8 more columns]
